# Supplementary material for: Thermally Induced Solid-Phase Quasi-Intramolecular Redox Reactions of [Hexakis(urea-O)iron(III)] Permanganate: An Easy Reaction Route to Prepare Potential (Fe,Mn)Ox Catalysts for CO2 Hydrogenation
Source: PubMed Central journal article supplement (PMC9477215; doi:10.1021/acs.inorgchem.2c02265), 2022-08-31
Supplement: ic2c02265_si_001.pdf [file ic2c02265_si_001.pdf]

# Supporting Information

## Thermally-induced solid-phase quasi-intramolecular redox reactions of [hexakis(urea-O)iron(III)] permanganate – an easy reaction route to prepare potential (Fe,Mn)O<sub>x</sub> catalysts for CO<sub>2</sub> hydrogenation

*Kende Attila Béres<sup>1,2</sup>, Zoltán Homonnay<sup>2</sup>, Libor Kvitek<sup>3</sup>, Zsolt Dürvanger<sup>4</sup>, Martina Kubikova<sup>3</sup>, Veronika Harmat<sup>4,5</sup>, Fanni Szilágyi<sup>1,6</sup>, Zsuzsanna Czégény<sup>1</sup>, Péter Németh<sup>7</sup>, Laura Bereczki<sup>1</sup>, Vladimir M. Petruševski<sup>8</sup>, Mátyás Pápai<sup>9</sup>, Attila Farkas<sup>10</sup> and László Kótai<sup>1,11</sup> \**

<sup>1</sup>Institute of Materials and Environmental Chemistry, Research Centre for Natural Sciences, Magyar Tudósok krt. 2., H-1117 Budapest, Hungary;

<sup>2</sup>Institute of Chemistry, ELTE Eötvös Loránd University, Pázmány Péter s. 1/A, H-1117 Budapest, Hungary

<sup>3</sup>Palacky University Olomouc, Faculty of Science, Department of Physical Chemistry, 17. Listopadu 12, Olomouc 77146, Czech Republic

<sup>4</sup>Structural Chemistry and Biology Laboratory, Institute of Chemistry, ELTE Eötvös Loránd University, Pázmány Péter s. 1/A, H-1117 Budapest, Hungary

<sup>5</sup>ELKH-ELTE Protein Modelling Research Group, Pázmány Péter s. 1/A, H-1117 Budapest, Hungary

<sup>6</sup>Bay Zoltan Ltd. for Applied Research, Production Division (BAY-PROD), 1 Kondorfa, Budapest 1116, Hungary

<sup>7</sup>Institute for Geological and Geochemical Research, Research Centre for Astronomy and Earth Sciences, ELKH, Budaörsi street 45, 1112 Budapest, Hungary

<sup>8</sup>Faculty of Natural Sciences and Mathematics, Ss. Cyril and Methodius University, Skopje, MK-1000, North Macedonia

<sup>9</sup>Wigner Research Centre for Physics, H-1525 Budapest, P.O. Box 49, Hungary

<sup>10</sup>Department of Organic Chemistry, Budapest University of Technology and Economics, Műegyetem rakpart 3, 1111 Budapest, Hungary

<sup>11</sup>Deuton-X Ltd., Selmei u. 89, H-2030, Érd, Hungary

\* Corresponding author: kotai.laszlo@ttk.hu

**ESI Table S1.** The Powder X-ray diffraction data of compound **1** refined to trigonal cell.

18.1241 18.1241 13.5493  
90 90 120  
sg=R3 unindexed=0 vol=3854.406 gof=40.97 zero=0

| <i>h</i> | <i>k</i> | <i>l</i> | dc      | do     | do-dc   | 2Thc    | 2Tho    | 2Tho-2Thc |
|----------|----------|----------|---------|--------|---------|---------|---------|-----------|
| 1        | 0        | 1        | 10.2565 |        |         | 8.6144  |         |           |
| 1        | 1        | 0        | 9.0620  | 9.0480 | -0.0140 | 9.7524  | 9.7675  | 0.0151    |
| 0        | 2        | 1        | 6.7910  | 6.7809 | -0.0102 | 13.0260 | 13.0456 | 0.0196    |
| 0        | 1        | 2        | 6.2200  | 6.2234 | 0.0034  | 14.2278 | 14.2200 | -0.0078   |
| 1        | 2        | -1       | 5.4344  | 5.4287 | -0.0057 | 16.2976 | 16.3148 | 0.0172    |
| 0        | 3        | 0        | 5.2320  | 5.2336 | 0.0016  | 16.9327 | 16.9274 | -0.0053   |
| 2        | 0        | 2        | 5.1282  | 5.1284 | 0.0001  | 17.2779 | 17.2775 | -0.0004   |
| 2        | 2        | 0        | 4.5310  | 4.5284 | -0.0027 | 19.5762 | 19.5879 | 0.0117    |
| 0        | 0        | 3        | 4.5164  |        |         | 19.6401 |         |           |
| 1        | 2        | 2        | 4.4631  | 4.4647 | 0.0016  | 19.8770 | 19.8698 | -0.0072   |
| 1        | -4       | -1       | 4.1446  | 4.1437 | -0.0009 | 21.4221 | 21.4266 | 0.0046    |
| 1        | -2       | -3       | 4.0422  | 4.0411 | -0.0012 | 21.9713 | 21.9777 | 0.0064    |
| 4        | 0        | 1        | 3.7691  |        |         | 23.5854 |         |           |
| 1        | 3        | -2       | 3.6623  | 3.6638 | 0.0014  | 24.2834 | 24.2737 | -0.0097   |
| 2        | 3        | -1       | 3.4801  | 3.4802 | 0.0002  | 25.5760 | 25.5748 | -0.0012   |
| 4        | 1        | 0        | 3.4251  | 3.4248 | -0.0003 | 25.9935 | 25.9962 | 0.0027    |
| 3        | 0        | 3        | 3.4188  |        |         | 26.0424 |         |           |
| 0        | 4        | 2        | 3.3955  |        |         | 26.2242 |         |           |
| 1        | 0        | 4        | 3.3111  | 3.3114 | 0.0003  | 26.9053 | 26.9029 | -0.0023   |
| 2        | 2        | 3        | 3.1987  | 3.1979 | -0.0008 | 27.8690 | 27.8762 | 0.0073    |
| 2        | -5       | -2       | 3.1796  |        |         | 28.0398 |         |           |
| 0        | 2        | 4        | 3.1100  |        |         | 28.6810 |         |           |
| 0        | 5        | 1        | 3.0582  |        |         | 29.1777 |         |           |
| 3        | 3        | 0        | 3.0207  | 3.0217 | 0.0010  | 29.5481 | 29.5377 | -0.0104   |
| 2        | 1        | 4        | 2.9416  | 2.9417 | 0.0001  | 30.3614 | 30.3607 | -0.0007   |
| 2        | -6       | -1       | 2.8976  | 2.9000 | 0.0024  | 30.8334 | 30.8078 | -0.0257   |
| 5        | 0        | 2        | 2.8483  | 2.8472 | -0.0011 | 31.3815 | 31.3939 | 0.0125    |
| 1        | 5        | -1       | 2.7600  | 2.7601 | 0.0001  | 32.4126 | 32.4115 | -0.0012   |
| 1        | -5       | -3       | 2.7291  |        |         | 32.7895 |         |           |
| 4        | 2        | 2        | 2.7172  |        |         | 32.9371 |         |           |
| 1        | -4       | -4       | 2.6734  | 2.6730 | -0.0004 | 33.4931 | 33.4983 | 0.0052    |
| 0        | 1        | 5        | 2.6704  |        |         | 33.5319 |         |           |
| 0        | 6        | 0        | 2.6160  |        |         | 34.2500 |         |           |
| 1        | 5        | 2        | 2.6027  | 2.6019 | -0.0008 | 34.4300 | 34.4409 | 0.0108    |
| 4        | 0        | 4        | 2.5641  | 2.5659 | 0.0018  | 34.9651 | 34.9397 | -0.0253   |
| 2        | 0        | 5        | 2.5615  |        |         | 35.0025 |         |           |

**ESI Table S2.** The Powder X-ray diffraction data of compound **1** refined to monoclinic cell.

13.8479 18.1275 11.4037  
90 64.122 90  
sg=Cc unindexed=0 vol=2575.596 gof=43.16 zero=0.0183

| <i>h</i> | <i>k</i> | <i>l</i> | dc      | do     | do-dc   | 2Thc    | 2Tho    | 2Tho-2Thc |
|----------|----------|----------|---------|--------|---------|---------|---------|-----------|
| 1        | 1        | 0        | 10.2679 |        |         | 8.6048  |         |           |
| 1        | 1        | 1        | 9.0700  |        |         | 9.7438  |         |           |
| 0        | 2        | 0        | 9.0638  | 9.0480 | -0.0157 | 9.7505  | 9.7675  | 0.0170    |
| 0        | 2        | 1        | 6.7928  | 6.7809 | -0.0120 | 13.0225 | 13.0456 | 0.0231    |
| 2        | 0        | 0        | 6.2297  |        |         | 14.2056 |         |           |
| 1        | -1       | -1       | 6.2242  | 6.2234 | -0.0008 | 14.2181 | 14.2200 | 0.0019    |
| 2        | 2        | 1        | 5.4407  |        |         | 16.2787 |         |           |
| 1        | 1        | 2        | 5.4373  |        |         | 16.2890 |         |           |
| 1        | 3        | 0        | 5.4368  | 5.4287 | -0.0081 | 16.2903 | 16.3148 | 0.0245    |
| 2        | 0        | 2        | 5.2378  |        |         | 16.9138 |         |           |
| 1        | 3        | 1        | 5.2342  | 5.2336 | -0.0005 | 16.9256 | 16.9274 | 0.0018    |
| 2        | 2        | 0        | 5.1339  |        |         | 17.2585 |         |           |
| 0        | 0        | 2        | 5.1301  | 5.1284 | -0.0017 | 17.2715 | 17.2775 | 0.0059    |
| 2        | 2        | 2        | 4.5350  |        |         | 19.5589 |         |           |
| 0        | 4        | 0        | 4.5319  | 4.5284 | -0.0035 | 19.5725 | 19.5879 | 0.0154    |
| 3        | 1        | 1        | 4.4706  |        |         | 19.8434 |         |           |
| 1        | -3       | -1       | 4.4651  |        |         | 19.8682 |         |           |
| 0        | 2        | 2        | 4.4646  | 4.4647 | 0.0002  | 19.8706 | 19.8698 | -0.0008   |
| 3        | 1        | 2        | 4.1506  |        |         | 21.3906 |         |           |
| 1        | 3        | 2        | 4.1462  |        |         | 21.4138 |         |           |
| 0        | 4        | 1        | 4.1455  | 4.1437 | -0.0018 | 21.4174 | 21.4266 | 0.0093    |
| 3        | 1        | 0        | 4.0482  |        |         | 21.9383 |         |           |
| 2        | -2       | -1       | 4.0457  |        |         | 21.9522 |         |           |
| 1        | -1       | -2       | 4.0443  | 4.0411 | -0.0032 | 21.9600 | 21.9777 | 0.0177    |
| 2        | 4        | 1        | 3.7716  |        |         | 23.5698 |         |           |
| 3        | 3        | 1        | 3.6667  |        |         | 24.2541 |         |           |
| 2        | 4        | 0        | 3.6648  |        |         | 24.2671 |         |           |
| 1        | 1        | 3        | 3.6639  | 3.6638 | -0.0001 | 24.2729 | 24.2737 | 0.0008    |
| 3        | 3        | 2        | 3.4838  |        |         | 25.5480 |         |           |
| 2        | 2        | 3        | 3.4823  |        |         | 25.5592 |         |           |
| 1        | 5        | 0        | 3.4811  | 3.4802 | -0.0009 | 25.5683 | 25.5748 | 0.0065    |
| 3        | 1        | 3        | 3.4288  |        |         | 25.9651 |         |           |
| 2        | 4        | 2        | 3.4271  |        |         | 25.9781 |         |           |
| 1        | 5        | 1        | 3.4261  | 3.4249 | -0.0012 | 25.9859 | 25.9955 | 0.0096    |
| 3        | 3        | 0        | 3.4226  |        |         | 26.0129 |         |           |
| 1        | -3       | -2       | 3.4202  |        |         | 26.0313 |         |           |
| 4        | 0        | 2        | 3.4013  |        |         | 26.1789 |         |           |
| 0        | 4        | 2        | 3.3964  |        |         | 26.2171 |         |           |
| 3        | -1       | -1       | 3.3149  |        |         | 26.8739 |         |           |
| 2        | 0        | -2       | 3.3135  | 3.3114 | -0.0022 | 26.8850 | 26.9029 | 0.0179    |
| 4        | 2        | 1        | 3.2037  |        |         | 27.8246 |         |           |
| 2        | -4       | -1       | 3.2007  |        |         | 27.8517 |         |           |
| 0        | 2        | 3        | 3.1998  | 3.1979 | -0.0019 | 27.8592 | 27.8762 | 0.0170    |
| 4        | 2        | 2        | 3.1845  |        |         | 27.9966 |         |           |
| 1        | 3        | 3        | 3.1808  |        |         | 28.0293 |         |           |
| 1        | -5       | -1       | 3.1806  |        |         | 28.0308 |         |           |
| 4        | 0        | 0        | 3.1148  |        |         | 28.6356 |         |           |
| 2        | -2       | -2       | 3.1121  |        |         | 28.6613 |         |           |
| 1        | 5        | 2        | 3.0591  |        |         | 29.1689 |         |           |
| 3        | 3        | 3        | 3.0233  |        |         | 29.5216 |         |           |

|   |    |    |        |        |         |         |         |         |
|---|----|----|--------|--------|---------|---------|---------|---------|
| 0 | 6  | 0  | 3.0213 | 3.0217 | 0.0005  | 29.5424 | 29.5377 | -0.0048 |
| 4 | 2  | 0  | 2.9457 |        |         | 30.3177 |         |         |
| 3 | -3 | -1 | 2.9444 |        |         | 30.3321 |         |         |
| 1 | -1 | -3 | 2.9429 | 2.9417 | -0.0013 | 30.3474 | 30.3607 | 0.0133  |
| 4 | 2  | 3  | 2.9014 |        |         | 30.7928 |         |         |
| 2 | 4  | 3  | 2.8991 |        |         | 30.8175 |         |         |
| 0 | 6  | 1  | 2.8982 | 2.8964 | -0.0018 | 30.8271 | 30.8464 | 0.0194  |
| 3 | 5  | 1  | 2.8505 |        |         | 31.3560 |         |         |
| 2 | 0  | 4  | 2.8499 | 2.8472 | -0.0027 | 31.3635 | 31.3939 | 0.0304  |
| 3 | 1  | 4  | 2.7622 |        |         | 32.3858 |         |         |
| 3 | 5  | 2  | 2.7620 |        |         | 32.3877 |         |         |
| 2 | 6  | 1  | 2.7612 | 2.7601 | -0.0011 | 32.3981 | 32.4115 | 0.0134  |
| 5 | 1  | 2  | 2.7338 |        |         | 32.7315 |         |         |
| 4 | 4  | 1  | 2.7323 |        |         | 32.7495 |         |         |
| 3 | 5  | 0  | 2.7312 |        |         | 32.7633 |         |         |
| 1 | 1  | 4  | 2.7302 |        |         | 32.7762 |         |         |
| 1 | -5 | -2 | 2.7300 |        |         | 32.7782 |         |         |
| 0 | 4  | 3  | 2.7299 |        |         | 32.7793 |         |         |
| 4 | 4  | 2  | 2.7203 |        |         | 32.8980 |         |         |
| 2 | 2  | 4  | 2.7186 |        |         | 32.9193 |         |         |
| 2 | 6  | 0  | 2.7184 |        |         | 32.9219 |         |         |
| 5 | 1  | 1  | 2.6779 |        |         | 33.4346 |         |         |
| 2 | -4 | -2 | 2.6748 |        |         | 33.4742 |         |         |
| 1 | -3 | -3 | 2.6744 |        |         | 33.4792 |         |         |
| 3 | -1 | -2 | 2.6727 | 2.6730 | 0.0002  | 33.5012 | 33.4983 | -0.0029 |
| 4 | 0  | 4  | 2.6189 |        |         | 34.2109 |         |         |
| 2 | 6  | 2  | 2.6171 |        |         | 34.2353 |         |         |
| 5 | 1  | 3  | 2.6068 |        |         | 34.3743 |         |         |
| 1 | 5  | 3  | 2.6035 |        |         | 34.4191 |         |         |
| 0 | 6  | 2  | 2.6033 | 2.6019 | -0.0014 | 34.4217 | 34.4409 | 0.0191  |
| 4 | 4  | 0  | 2.5670 |        |         | 34.9249 |         |         |
| 0 | 0  | 4  | 2.5650 | 2.5659 | 0.0009  | 34.9519 | 34.9397 | -0.0122 |
| 4 | -2 | -1 | 2.5645 |        |         | 34.9599 |         |         |
| 4 | 4  | 3  | 2.5374 |        |         | 35.3445 |         |         |
| 3 | 3  | 4  | 2.5366 |        |         | 35.3562 |         |         |
| 1 | 7  | 0  | 2.5355 |        |         | 35.3732 |         |         |
| 4 | 2  | 4  | 2.5160 |        |         | 35.6564 |         |         |
| 3 | 5  | 3  | 2.5150 |        |         | 35.6701 |         |         |
| 5 | 3  | 2  | 2.5146 |        |         | 35.6765 |         |         |
| 1 | 7  | 1  | 2.5140 |        |         | 35.6857 |         |         |
| 2 | -6 | -1 | 2.5120 |        |         | 35.7148 |         |         |
| 1 | 3  | 4  | 2.5118 |        |         | 35.7180 |         |         |
| 5 | 3  | 1  | 2.4709 |        |         | 36.3294 |         |         |
| 3 | -5 | -1 | 2.4690 |        |         | 36.3578 |         |         |
| 5 | 1  | 0  | 2.4686 |        |         | 36.3635 |         |         |
| 0 | 2  | 4  | 2.4681 |        |         | 36.3716 |         |         |
| 3 | -3 | -2 | 2.4668 | 2.4667 | -0.0002 | 36.3914 | 36.3939 | 0.0026  |
| 2 | -2 | -3 | 2.4663 |        |         | 36.3995 |         |         |

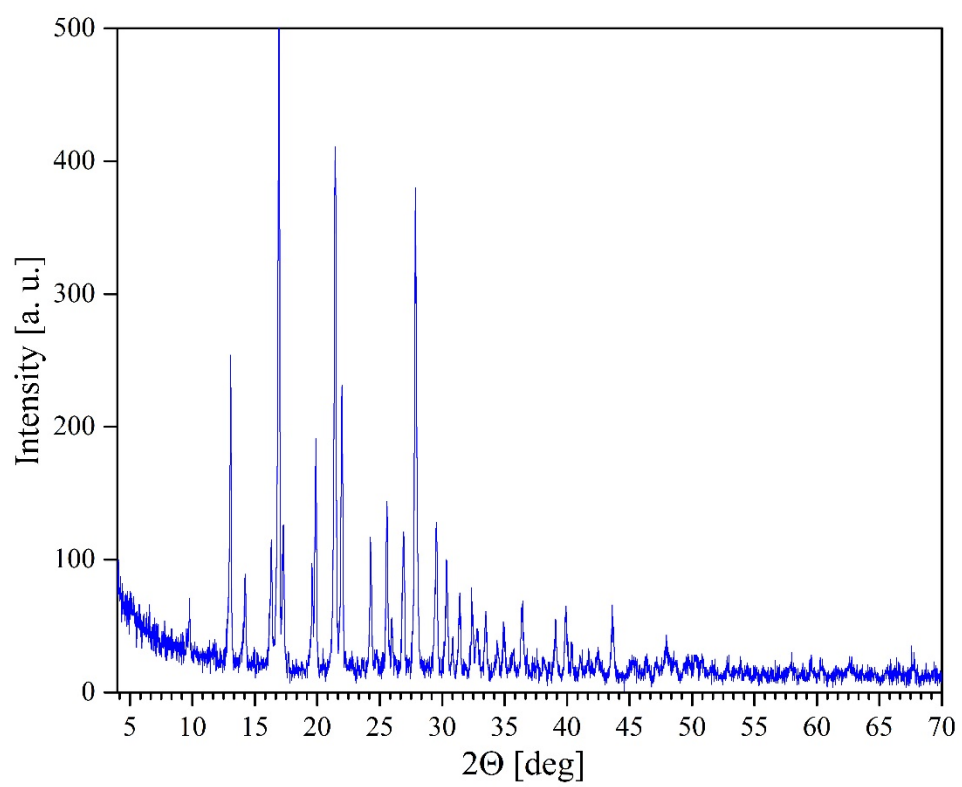

**ESI Figure S1.** The powder XRD of the compound **1**.

**ESI Table S3.** Single crystal XRD experiments. Crystal data and structure refinement of compound **1**.

|                                        |                                                                                                                             |
|----------------------------------------|-----------------------------------------------------------------------------------------------------------------------------|
| Empirical formula                      | C <sub>6</sub> H <sub>24</sub> FeMn <sub>3</sub> N <sub>12</sub> O <sub>18</sub>                                            |
| Formula weight                         | 773.04                                                                                                                      |
| Temperature                            | 100.00(10)                                                                                                                  |
| Radiation and wavelength               | Cu-K $\alpha$ , $\lambda$ = 1.54184 Å                                                                                       |
| Crystal system                         | monoclinic                                                                                                                  |
| Space group                            | P2 <sub>1</sub> /c                                                                                                          |
| Unit cell dimensions                   | $a$ = 13.7008(7) Å<br>$b$ = 18.0084(5) Å<br>$c$ = 11.4125(4) Å<br>$\alpha$ = 90°<br>$\beta$ = 112.988(5)°<br>$\gamma$ = 90° |
| Volume                                 | 2592.2(2) Å <sup>3</sup>                                                                                                    |
| $Z$                                    | 4                                                                                                                           |
| Density (calculated)                   | 1.981 Mg/m <sup>3</sup>                                                                                                     |
| Absorption coefficient, $\mu$          | 16.959 mm <sup>-1</sup>                                                                                                     |
| $F(000)$                               | 1556.0                                                                                                                      |
| Crystal colour                         | dark purple                                                                                                                 |
| Crystal description                    | needle                                                                                                                      |
| Crystal size                           | 0.273 × 0.071 × 0.058 mm                                                                                                    |
| Absorption correction                  | numerical                                                                                                                   |
| Max. and min. transmission             | 1.00000 0.05829                                                                                                             |
| $\theta$ range for data collection     | 7.008 ≤ $2\theta$ ≤ 150.808°                                                                                                |
| Index ranges                           | -17 ≤ $h$ ≤ 16, -22 ≤ $k$ ≤ 17, -14 ≤ $l$ ≤ 12                                                                              |
| Reflections collected                  | 23228                                                                                                                       |
| Completeness to $2\theta$              | 0.952                                                                                                                       |
| Independent reflections                | 5128 [ $R(\text{int})$ = 0.0711]                                                                                            |
| Reflections $I > 2\sigma(I)$           | 4231                                                                                                                        |
| Refinement method                      | full-matrix least-squares on $F^2$                                                                                          |
| Data / restraints / parameters         | 5128/93/380                                                                                                                 |
| Goodness-of-fit on $F^2$               | 1.089                                                                                                                       |
| Final $R$ indices [ $I > 2\sigma(I)$ ] | $R_1$ = 0.0728, $wR_2$ = 0.1862                                                                                             |
| $R$ indices (all data)                 | $R_1$ = 0.0866, $wR_2$ = 0.1946                                                                                             |
| Max. and mean shift/esd                | 0.000; 0.000                                                                                                                |
| Largest diff. peak and hole            | 1.63/-0.92 e.Å <sup>-3</sup>                                                                                                |

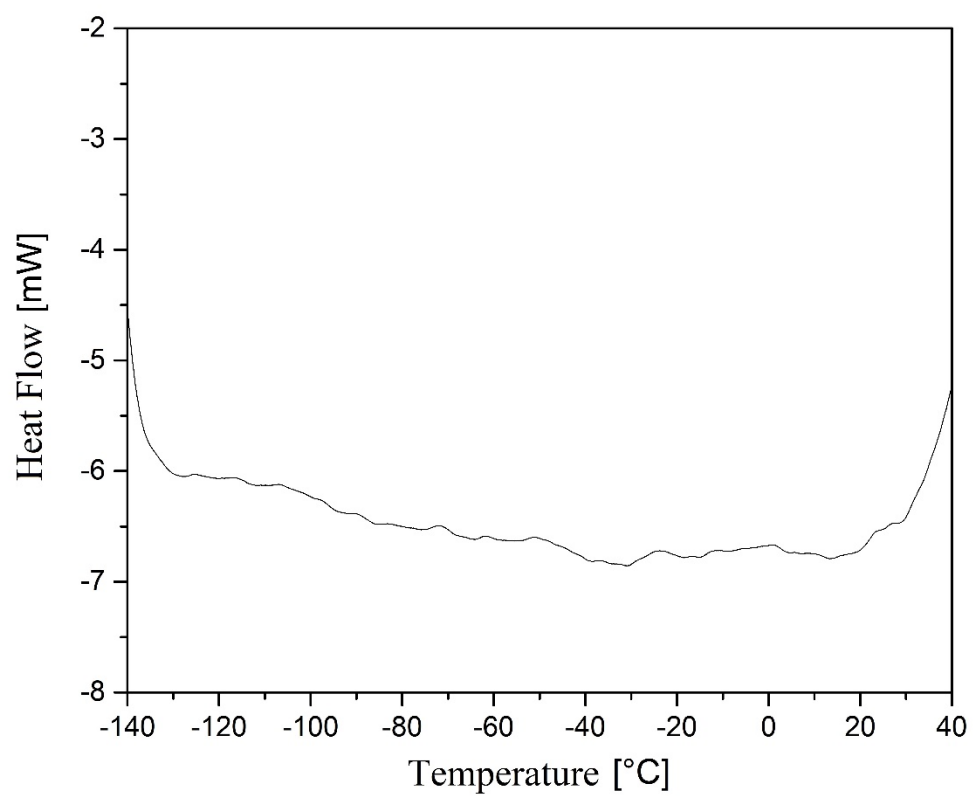

**ESI Figure S2.** The low-temperature DSC measurement of compound **1**.

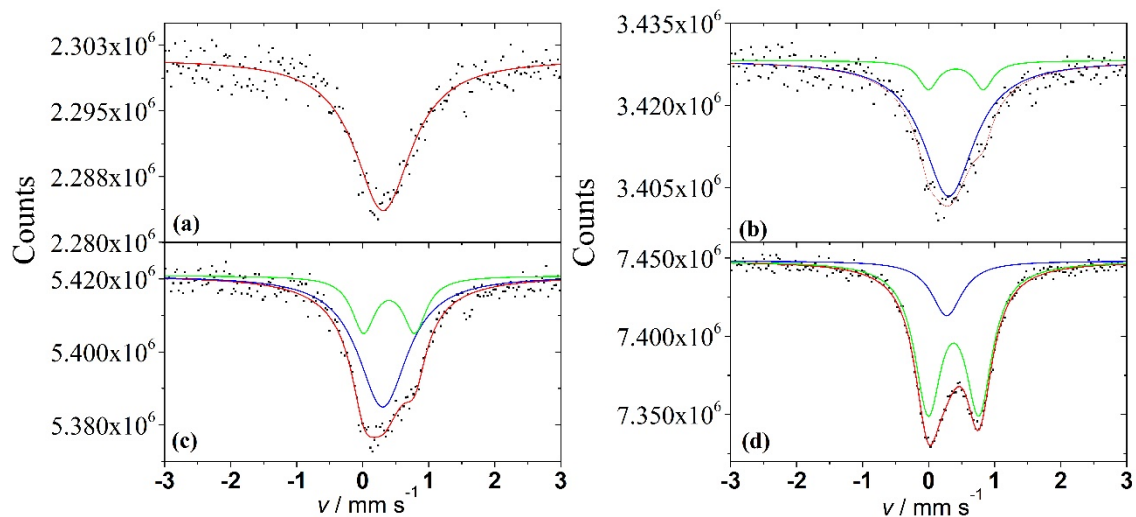

**ESI Figure S3.** Mössbauer spectra showing the decomposition of compound **1** on standing in air at room temperature for 1, 2, 3 and 5 days, (a, b, c and d, respectively).



**ESI Table S4.** The Mössbauer parameters of compound **1** and its decomposition products obtained while recording the Mössbauer spectrum for up to 5 days at room temperature.

| <i>Component</i>               | Day 1          | Day2           |                | Day3           |                | Day 5          |                |
|--------------------------------|----------------|----------------|----------------|----------------|----------------|----------------|----------------|
|                                | Singlet        | Singlet        | Doublet        | Singlet        | Doublet        | Singlet        | Doublet        |
| <i>Relative area</i> (%)       | 100            | 86.71          | 13.29          | 72.40          | 27.60          | 18.13          | 81.87          |
| $\delta$ (mm·s <sup>-1</sup> ) | 0.315 (±0.012) | 0.306 (±0.011) | 0.412 (±0.023) | 0.304 (±0.011) | 0.400 (±0.012) | 0.275 (±0.010) | 0.377 (±0.003) |
| $\Delta$ (mm·s <sup>-1</sup> ) | ---            | ---            | 0.834 (±0.054) | ---            | 0.776 (±0.032) | ---            | 0.770 (±0.007) |
| $\Gamma$ (mm·s <sup>-1</sup> ) | 1.036 (±0.063) | 0.948 (±0.066) | 0.352 (±0.130) | 0.917 (±0.067) | 0.424 (±0.078) | 0.563 (±0.083) | 0.490 (±0.012) |

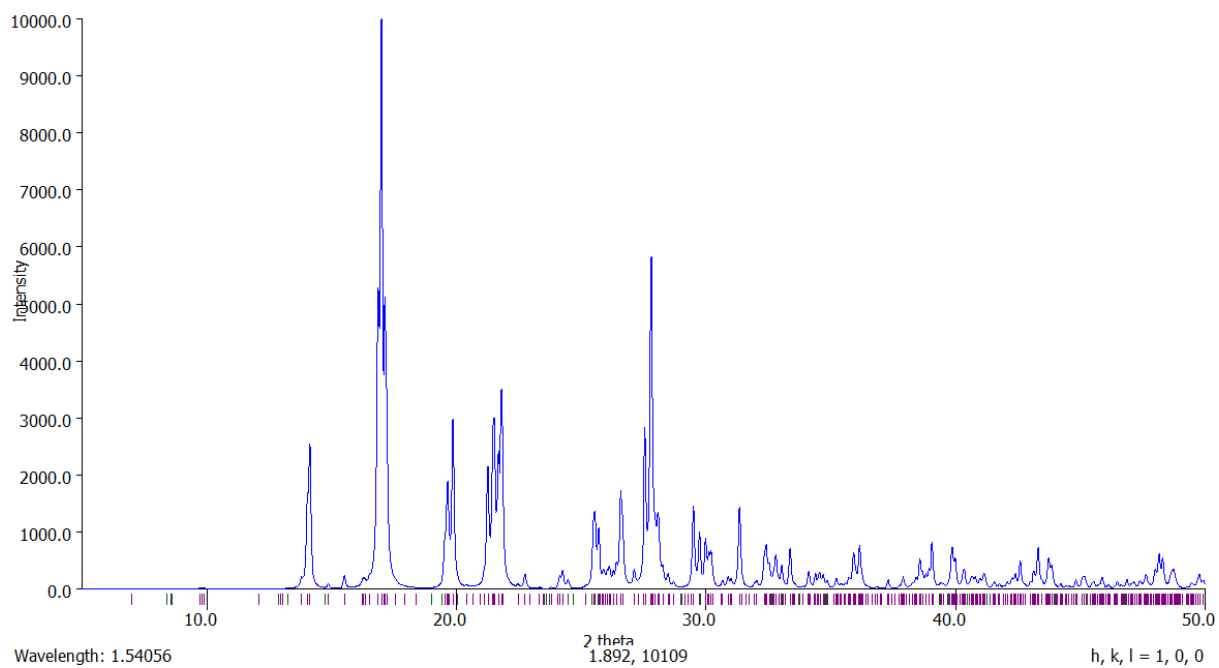

**ESI Figure S4.** Single crystal XRD experiment on compound **1**. Calculated powder pattern.

**ESI Table S5.** Hydrogen bonds in the crystal structure of compound **1**.

| D-H...A                       | d(D-H)/Å | d(H-A)/Å | d(D-A)/Å | D-H-A/° | sym op           |
|-------------------------------|----------|----------|----------|---------|------------------|
| <b>Intramolecular H-bond</b>  |          |          |          |         |                  |
| N12-H12A..O2                  | 0.88     | 2.19     | 2.937(7) | 142.3   |                  |
| N4-H4A..O6                    | 0.88     | 2.20     | 2.920(7) | 139.0   |                  |
| N8-H8A..O10                   | 0.88     | 2.18     | 2.915(7) | 140.6   |                  |
| N24-H24A..O14                 | 0.88     | 2.20     | 2.952(7) | 142.5   |                  |
| N16-H16A..O18                 | 0.88     | 2.21     | 2.940(7) | 140.0   |                  |
| N20-H20A..O22                 | 0.88     | 2.22     | 2.966(7) | 142.6   |                  |
| <b>Intermolecular, urea 1</b> |          |          |          |         |                  |
| N4-H4A..O38A                  | 0.88     | 2.49     | 3.146(7) | 131.7   | +x,1/2-y,1/2+z   |
| N4-H4B..O29                   | 0.88     | 2.61     | 3.322(7) | 138.9   | +x,+y,1+z        |
| N4-H4B..O34                   | 0.88     | 2.63     | 3.222(7) | 125.5   |                  |
| N4-H4B..O40                   | 0.88     | 2.37     | 3.015(7) | 130.0   | +x,1/2-y,1/2+z   |
| N5-H5A..O28                   | 0.88     | 2.12     | 2.946(7) | 154.9   | +x,3/2-y,1/2+z   |
| N5-H5A..O27B                  | 0.88     | 2.55     | 3.27(4)  | 139.2   | +x,3/2-y,1/2+z   |
| N5-H5B..O29                   | 0.88     | 2.29     | 3.077(7) | 148.8   | +x,+y,1+z        |
| N5-H5B..O30                   | 0.88     | 2.42     | 2.951(7) | 118.7   | +x,+y,1+z        |
| <b>Intermolecular, urea 2</b> |          |          |          |         |                  |
| N8-H8A..O27A                  | 0.88     | 2.64     | 3.292(8) | 132.1   | -x,1-y,-z        |
| N8-H8B..O39                   | 0.88     | 2.27     | 2.989(7) | 138.2   |                  |
| N8-H8B..O28                   | 0.88     | 2.62     | 3.283(8) | 132.5   | -x,-1/2+y,1/2-z  |
| N8-H8B..O30                   | 0.88     | 2.48     | 3.058(7) | 123.5   | -x,1-y,-z        |
| N9-H9A..O39                   | 0.88     | 2.66     | 3.319(8) | 132.9   | +x,1/2-y,1/2+z   |
| N9-H9A..O38A                  | 0.88     | 2.21     | 3.039(8) | 157.5   | +x,1/2-y,1/2+z   |
| N9-H9B..O27A                  | 0.88     | 2.50     | 3.337(8) | 158.7   | -x,-1/2+y,1/2-z  |
| N9-H9B..O38B                  | 0.88     | 2.17     | 2.96(4)  | 149.7   |                  |
| <b>Intermolecular, urea 3</b> |          |          |          |         |                  |
| N12-H12B..O39                 | 0.88     | 2.15     | 2.980(8) | 156.7   | -x,1/2+y,1/2-z   |
| N12-H12B..O30                 | 0.88     | 2.43     | 2.876(7) | 111.9   | +x,3/2-y,1/2+z   |
| N13-H13A..O29                 | 0.88     | 2.50     | 3.102(7) | 126.5   | -x,1-y,-z        |
| N13-H13A..O27A                | 0.88     | 2.26     | 3.098(8) | 159.8   | -x,1-y,-z        |
| N13-H13B..O39                 | 0.88     | 2.57     | 3.298(8) | 140.5   | -x,1/2+y,1/2-z   |
| N13-H13B..O40                 | 0.88     | 2.38     | 3.021(8) | 129.5   | -x,1/2+y,1/2-z   |
| N13-H13B..O27A                | 0.88     | 2.65     | 3.364(8) | 138.5   |                  |
| <b>Intermolecular, urea 4</b> |          |          |          |         |                  |
| N16-H16A..O32A                | 0.88     | 2.61     | 3.252(8) | 131.0   | +x,3/2-y,-1/2+z  |
| N16-H16B..O33                 | 0.88     | 2.33     | 3.056(7) | 139.8   |                  |
| N16-H16B..O35                 | 0.88     | 2.51     | 3.100(7) | 124.7   | +x,3/2-y,-1/2+z  |
| N17-H17A..O34                 | 0.88     | 2.21     | 3.037(8) | 155.7   | 1-x,1-y,2-z      |
| N17-H17A..O32B                | 0.88     | 2.55     | 3.25(4)  | 137.7   | 1-x,1-y,2-z      |
| N17-H17B..O33                 | 0.88     | 2.65     | 3.306(7) | 132.3   |                  |
| N17-H17B..O37                 | 0.88     | 2.59     | 3.275(8) | 135.3   | 1-x,1/2+y,3/2-z  |
| N17-H17B..O32B                | 0.88     | 2.29     | 3.04(4)  | 143.4   |                  |
| <b>Intermolecular, urea 5</b> |          |          |          |         |                  |
| N20-H20B..O29                 | 0.88     | 2.39     | 3.079(7) | 135.9   |                  |
| N20-H20B..O34                 | 0.88     | 2.44     | 3.143(8) | 137.1   | +x,+y,-1+z       |
| N20-H20B..O40                 | 0.88     | 2.50     | 2.918(7) | 110.1   | +x,1/2-y,-1/2+z  |
| N21-H21A..O32A                | 0.88     | 2.22     | 3.063(8) | 161.3   | +x,3/2-y,-1/2+z  |
| N21-H21B..O32A                | 0.88     | 2.49     | 3.339(8) | 163.1   | +x,+y,-1+z       |
| N21-H21B..O27B                | 0.88     | 2.21     | 3.04(4)  | 158.1   |                  |
| <b>Intermolecular, urea 6</b> |          |          |          |         |                  |
| N24-H24B..O33                 | 0.88     | 2.26     | 3.062(7) | 151.8   | 1-x,-1/2+y,3/2-z |
| N24-H24B..O35                 | 0.88     | 2.42     | 2.865(7) | 111.7   | 1-x,1-y,2-z      |
| N25-H25A..O37                 | 0.88     | 2.17     | 2.926(8) | 143.2   | +x,1/2-y,-1/2+z  |
| N25-H25A..O38B                | 0.88     | 2.37     | 3.17(4)  | 150.4   | +x,1/2-y,-1/2+z  |
| N25-H25B..O33                 | 0.88     | 2.48     | 3.229(7) | 143.7   | 1-x,-1/2+y,3/2-z |
| N25-H25B..O35                 | 0.88     | 2.38     | 3.009(8) | 129.1   | 1-x,-1/2+y,3/2-z |

**ESI Table S6.** Single crystal XRD experiment on compound **1**. Atomic coordinates ( $\times 10^4$ ) and equivalent isotropic displacement parameters ( $\text{\AA}^2 \times 10^3$ ).  $U(\text{eq})$  is defined as one third of the trace of the orthogonalized  $U_{ij}$  tensor.

| <i>Atom</i> | <i>x</i>  | <i>y</i>  | <i>z</i>   | <i>U(eq)</i> |
|-------------|-----------|-----------|------------|--------------|
| Fe1         | 2545.7(7) | 5014.3(5) | 4932.7(8)  | 21.0(3)      |
| O6          | 2076(4)   | 4185(2)   | 5747(4)    | 25.2(9)      |
| O14         | 3907(4)   | 5041(2)   | 6488(4)    | 27.3(10)     |
| O18         | 3030(4)   | 5873(2)   | 4200(4)    | 27.1(10)     |
| O10         | 1206(4)   | 4939(2)   | 3371(4)    | 28.7(10)     |
| O2          | 1876(4)   | 5749(2)   | 5703(4)    | 23.9(9)      |
| O22         | 3183(4)   | 4292(2)   | 4100(4)    | 27.5(10)     |
| O33         | 4675(4)   | 7080(2)   | 9409(4)    | 29.8(10)     |
| O29         | 1363(4)   | 6170(2)   | -357(4)    | 28.5(10)     |
| O37         | 3278(4)   | 1794(3)   | 5938(4)    | 37.8(12)     |
| O35         | 4909(4)   | 7096(3)   | 11807(4)   | 35.4(11)     |
| O34         | 3864(4)   | 6001(2)   | 10320(5)   | 36.3(11)     |
| O39         | 1442(4)   | 1763(2)   | 3951(4)    | 34.4(11)     |
| O28         | 589(4)    | 7213(3)   | 669(5)     | 40.0(12)     |
| O30         | 415(4)    | 7328(3)   | -1712(4)   | 37.7(12)     |
| N25         | 3555(5)   | 3151(3)   | 3612(6)    | 35.8(14)     |
| N9          | 1744(5)   | 3035(3)   | 6221(6)    | 37.0(14)     |
| O40         | 2344(4)   | 509(3)    | 5060(5)    | 38.8(12)     |
| N4          | 2242(5)   | 5289(3)   | 7691(5)    | 31.9(13)     |
| N16         | 4194(5)   | 6279(3)   | 6884(6)    | 34.7(13)     |
| N8          | 1160(5)   | 3399(3)   | 4133(6)    | 35.5(14)     |
| N12         | 454(5)    | 6082(3)   | 3067(6)    | 43.1(17)     |
| N5          | 1718(5)   | 6502(3)   | 7194(5)    | 33.2(13)     |
| N21         | 2860(5)   | 6738(3)   | 2709(5)    | 35.8(14)     |
| N20         | 2828(5)   | 5502(3)   | 2213(5)    | 38.6(15)     |
| N13         | -12(5)    | 5238(3)   | 1460(6)    | 38.0(14)     |
| N24         | 4177(5)   | 3524(3)   | 5684(6)    | 41.8(16)     |
| N17         | 5028(5)   | 5418(3)   | 8408(6)    | 39.7(15)     |
| C19         | 2904(5)   | 6030(4)   | 3059(6)    | 27.9(14)     |
| C3          | 1938(5)   | 5837(3)   | 6844(6)    | 26.1(13)     |
| C23         | 3635(5)   | 3669(3)   | 4463(6)    | 29.9(14)     |
| C11         | 564(5)    | 5416(3)   | 2654(6)    | 28.5(14)     |
| C15         | 4359(5)   | 5578(4)   | 7243(6)    | 30.1(14)     |
| C7          | 1661(5)   | 3553(3)   | 5360(6)    | 29.8(14)     |
| Mn2A        | 4143.7(9) | 6862.6(5) | 10393.3(9) | 22.2(3)      |
| Mn1A        | 443.5(9)  | 6779.1(6) | -613.9(10) | 24.2(3)      |
| Mn3A        | 2549.5(9) | 1341.6(6) | 4697.3(11) | 25.6(3)      |
| O32A        | 3054(4)   | 7331(3)   | 10037(5)   | 33.4(11)     |
| O27A        | -692(4)   | 6351(3)   | -1104(5)   | 35.2(11)     |
| O38A        | 3174(4)   | 1284(3)   | 3745(5)    | 37.9(12)     |
| Mn1B        | 1077(13)  | 7014(7)   | -314(11)   | 24.2(3)      |
| Mn2B        | 4755(12)  | 6620(7)   | 10628(10)  | 22.2(3)      |
| Mn3B        | 2246(11)  | 1357(6)   | 5113(14)   | 25.6(3)      |
| O27B        | 2200(20)  | 7473(19)  | 110(30)    | 35.2(11)     |
| O32B        | 5870(20)  | 6152(18)  | 11020(30)  | 33.4(11)     |
| O38B        | 1600(30)  | 1390(20)  | 6110(30)   | 37.9(12)     |

**ESI Table S7.** Single crystal XRD experiment on compound **1**. Hydrogen coordinates ( $\times 10^4$ ) and isotropic displacement parameters ( $\text{\AA}^2 \times 10^3$ ).

| <i>Atom</i> | <i>x</i> | <i>y</i> | <i>z</i> | <i>U(iso)</i> |
|-------------|----------|----------|----------|---------------|
| H25A        | 3190.46  | 3238.44  | 2798.39  | 43            |
| H25B        | 3866.79  | 2718.7   | 3858.71  | 43            |
| H9A         | 2079.24  | 3133.14  | 7036.42  | 44            |
| H9B         | 1463.68  | 2593.03  | 5976.75  | 44            |
| H4A         | 2407.44  | 4852.17  | 7473.26  | 38            |
| H4B         | 2278.73  | 5362.21  | 8469.2   | 38            |
| H16A        | 3761.55  | 6390.62  | 6103.02  | 42            |
| H16B        | 4516.97  | 6634.2   | 7426.19  | 42            |
| H8A         | 1106.95  | 3739.33  | 3558.25  | 43            |
| H8B         | 881.39   | 2956.33  | 3894.12  | 43            |
| H12A        | 831.38   | 6208.32  | 3860.96  | 52            |
| H12B        | 3.06     | 6400.2   | 2548.49  | 52            |
| H5A         | 1534.21  | 6870.52  | 6644.16  | 40            |
| H5B         | 1756.44  | 6571.76  | 7973.55  | 40            |
| H21A        | 2917.6   | 7093.06  | 3262.86  | 43            |
| H21B        | 2773.08  | 6851.75  | 1924.99  | 43            |
| H20A        | 2864.49  | 5031.38  | 2434.92  | 46            |
| H20B        | 2741.1   | 5622.62  | 1431.18  | 46            |
| H13A        | 51.46    | 4795.62  | 1170.98  | 46            |
| H13B        | -459.78  | 5562.42  | 952.81   | 46            |
| H24A        | 4229.43  | 3861.96  | 6261.85  | 50            |
| H24B        | 4484.68  | 3088.81  | 5917.04  | 50            |
| H17A        | 5154.84  | 4952.01  | 8650.64  | 48            |
| H17B        | 5347.03  | 5777.81  | 8942.24  | 48            |

**ESI Table S8.** Anisotropic displacement parameters ( $\text{\AA}^2 \times 10^3$ ). The anisotropic displacement factor exponent takes the form:  $-2\pi^2(h^2a^{*2}U_{11} + \dots + 2hka^*b^*U_{12})$

| <i>Atom</i> | $U_{11}$ | $U_{22}$ | $U_{33}$ | $U_{23}$ | $U_{13}$ | $U_{12}$ |
|-------------|----------|----------|----------|----------|----------|----------|
| Fe1         | 31.9(6)  | 15.2(4)  | 14.7(4)  | -0.7(3)  | 7.8(4)   | 1.4(4)   |
| O6          | 35(3)    | 17.7(19) | 19(2)    | -3.7(16) | 7.2(18)  | -5.2(17) |
| O14         | 34(3)    | 22(2)    | 20(2)    | -4.6(17) | 3.9(18)  | -2.6(18) |
| O18         | 42(3)    | 21(2)    | 18(2)    | 0.3(16)  | 10.8(19) | -0.9(18) |
| O10         | 38(3)    | 21(2)    | 17(2)    | 0.9(16)  | 0.3(18)  | 5.6(18)  |
| O2          | 34(2)    | 21.2(19) | 17.0(19) | 0.1(16)  | 10.3(18) | 0.7(17)  |
| O22         | 37(3)    | 20(2)    | 23(2)    | 0.4(17)  | 10.2(19) | 9.4(18)  |
| O33         | 41(3)    | 26(2)    | 28(2)    | -1.6(18) | 19(2)    | -4.3(19) |
| O29         | 39(3)    | 23(2)    | 25(2)    | 6.0(17)  | 13.2(19) | 7.0(19)  |
| O37         | 44(3)    | 36(3)    | 29(2)    | -1(2)    | 9(2)     | 1(2)     |
| O35         | 45(3)    | 44(3)    | 18(2)    | -3(2)    | 13(2)    | -8(2)    |
| O34         | 46(3)    | 27(2)    | 37(3)    | 1(2)     | 17(2)    | -9(2)    |
| O39         | 39(3)    | 25(2)    | 31(2)    | 0.8(19)  | 5(2)     | 2(2)     |
| O28         | 45(3)    | 43(3)    | 32(3)    | -13(2)   | 15(2)    | 3(2)     |
| O30         | 54(3)    | 32(2)    | 29(3)    | 7(2)     | 18(2)    | 11(2)    |
| N25         | 41(4)    | 29(3)    | 32(3)    | -6(2)    | 8(3)     | 8(2)     |
| N9          | 49(4)    | 24(3)    | 36(3)    | 1(2)     | 14(3)    | -7(3)    |
| O40         | 50(3)    | 20(2)    | 40(3)    | 7.6(19)  | 10(2)    | 2(2)     |
| N4          | 50(4)    | 24(3)    | 23(3)    | 3(2)     | 16(3)    | -2(2)    |
| N16         | 45(4)    | 23(3)    | 30(3)    | -4(2)    | 8(3)     | -9(2)    |
| N8          | 45(4)    | 22(3)    | 29(3)    | -1(2)    | 3(3)     | -7(2)    |
| N12         | 56(4)    | 25(3)    | 30(3)    | -4(2)    | -3(3)    | 12(3)    |
| N5          | 48(4)    | 27(3)    | 26(3)    | -4(2)    | 16(3)    | 7(2)     |
| N21         | 56(4)    | 27(3)    | 25(3)    | 4(2)     | 16(3)    | -5(3)    |
| N20         | 72(5)    | 26(3)    | 24(3)    | 0(2)     | 24(3)    | 7(3)     |
| N13         | 39(4)    | 32(3)    | 29(3)    | 1(2)     | -2(3)    | 2(3)     |
| N24         | 59(4)    | 28(3)    | 27(3)    | 1(2)     | 5(3)     | 17(3)    |
| N17         | 39(3)    | 30(3)    | 34(3)    | -6(2)    | -5(3)    | -2(3)    |
| C19         | 35(4)    | 30(3)    | 18(3)    | 1(2)     | 10(3)    | 2(3)     |
| C3          | 29(3)    | 25(3)    | 24(3)    | -4(2)    | 9(3)     | -1(2)    |
| C23         | 31(4)    | 25(3)    | 32(3)    | -2(3)    | 10(3)    | 3(3)     |
| C11         | 33(4)    | 23(3)    | 26(3)    | 1(2)     | 8(3)     | 3(3)     |
| C15         | 25(3)    | 29(3)    | 30(3)    | -2(3)    | 3(3)     | -6(3)    |
| C7          | 32(4)    | 21(3)    | 32(3)    | -2(3)    | 9(3)     | -2(3)    |
| Mn2A        | 28.8(6)  | 20.2(5)  | 17.9(5)  | 0.2(4)   | 9.4(4)   | -5.0(4)  |
| Mn1A        | 30.5(6)  | 22.9(5)  | 19.2(5)  | -0.8(4)  | 9.7(4)   | 4.6(4)   |
| Mn3A        | 26.2(6)  | 20.1(5)  | 26.6(6)  | -0.7(4)  | 6.3(4)   | 0.0(4)   |
| O32A        | 36(3)    | 31(2)    | 34(3)    | 0(2)     | 14(2)    | -2(2)    |
| O27A        | 37(3)    | 39(3)    | 33(3)    | -3(2)    | 17(2)    | -3(2)    |
| O38A        | 37(3)    | 42(3)    | 39(3)    | -10(2)   | 19(2)    | -11(2)   |
| Mn1B        | 30.5(6)  | 22.9(5)  | 19.2(5)  | -0.8(4)  | 9.7(4)   | 4.6(4)   |
| Mn2B        | 28.8(6)  | 20.2(5)  | 17.9(5)  | 0.2(4)   | 9.4(4)   | -5.0(4)  |
| Mn3B        | 26.2(6)  | 20.1(5)  | 26.6(6)  | -0.7(4)  | 6.3(4)   | 0.0(4)   |
| O27B        | 37(3)    | 39(3)    | 33(3)    | -3(2)    | 17(2)    | -3(2)    |
| O32B        | 36(3)    | 31(2)    | 34(3)    | 0(2)     | 14(2)    | -2(2)    |
| O38B        | 37(3)    | 42(3)    | 39(3)    | -10(2)   | 19(2)    | -11(2)   |

**ESI Table S9.** Bond lengths (Å) in compound **1**.

| <b>Atom</b> | <b>Atom</b> | <b>Bond Length</b> | <b>Atom</b> | <b>Atom</b> | <b>Bond Length</b> |
|-------------|-------------|--------------------|-------------|-------------|--------------------|
| Fe1         | O2          | 1.998(4)           | O28         | Mn1A        | 1.601(5)           |
| Fe1         | O6          | 1.993(4)           | O28         | Mn1B        | 1.555(11)          |
| Fe1         | O10         | 2.002(4)           | O29         | Mn1A        | 1.608(4)           |
| Fe1         | O14         | 2.012(4)           | O29         | Mn1B        | 1.574(11)          |
| Fe1         | O18         | 1.991(4)           | O30         | Mn1A        | 1.585(5)           |
| Fe1         | O22         | 2.001(4)           | O30         | Mn1B        | 1.600(11)          |
| O2          | C3          | 1.282(7)           | O40         | Mn3A        | 1.610(5)           |
| O6          | C7          | 1.273(7)           | O40         | Mn3B        | 1.537(11)          |
| O10         | C11         | 1.273(7)           | Mn1A        | O27A        | 1.627(5)           |
| O14         | C15         | 1.282(8)           | Mn1B        | O27B        | 1.644(18)          |
| O18         | C19         | 1.277(7)           | O33         | Mn2A        | 1.607(4)           |
| O22         | C23         | 1.271(7)           | O33         | Mn2B        | 1.586(11)          |
| N4          | C3          | 1.329(8)           | O34         | Mn2A        | 1.592(4)           |
| N5          | C3          | 1.334(8)           | O34         | Mn2B        | 1.588(11)          |
| N8          | C7          | 1.325(9)           | O35         | Mn2A        | 1.600(4)           |
| N9          | C7          | 1.328(9)           | O35         | Mn2B        | 1.538(11)          |
| N12         | C11         | 1.318(8)           | Mn2A        | O32A        | 1.622(5)           |
| N13         | C11         | 1.320(8)           | Mn2B        | O32B        | 1.646(18)          |
| N16         | C15         | 1.319(9)           | O37         | Mn3A        | 1.600(5)           |
| N17         | C15         | 1.318(9)           | O37         | Mn3B        | 1.570(11)          |
| N20         | C19         | 1.331(8)           | O39         | Mn3A        | 1.611(5)           |
| N21         | C19         | 1.330(8)           | O39         | Mn3B        | 1.538(11)          |
| N24         | C23         | 1.324(9)           | Mn3A        | O38A        | 1.628(5)           |
| N25         | C23         | 1.320(9)           | Mn3B        | O38B        | 1.696(19)          |

**ESI Table S10.** Bond angles (°) in compound **1**.

| Atom | Atom | Atom | Bond angle | Atom | Atom | Atom | Bond angle |
|------|------|------|------------|------|------|------|------------|
| O6   | Fe1  | O2   | 90.19(17)  | N25  | C23  | N24  | 119.0(6)   |
| O2   | Fe1  | O10  | 91.00(18)  | O28  | Mn1A | O29  | 110.9(2)   |
| O2   | Fe1  | O14  | 91.30(18)  | O30  | Mn1A | O28  | 112.0(3)   |
| O6   | Fe1  | O10  | 90.81(18)  | O30  | Mn1A | O29  | 110.2(2)   |
| O6   | Fe1  | O14  | 87.90(18)  | O28  | Mn1A | O27A | 107.8(3)   |
| O18  | Fe1  | O10  | 91.05(19)  | O29  | Mn1A | O27A | 108.4(2)   |
| O18  | Fe1  | O14  | 90.33(18)  | O30  | Mn1A | O27A | 107.4(3)   |
| O18  | Fe1  | O22  | 91.53(18)  | O28  | Mn1B | O29  | 115.3(8)   |
| O18  | Fe1  | O2   | 87.47(18)  | O28  | Mn1B | O30  | 113.7(8)   |
| O6   | Fe1  | O22  | 90.87(18)  | O29  | Mn1B | O30  | 111.2(7)   |
| O22  | Fe1  | O10  | 87.22(19)  | O28  | Mn1B | O27B | 106.6(15)  |
| O22  | Fe1  | O14  | 90.51(18)  | O29  | Mn1B | O27B | 106.2(15)  |
| O2   | Fe1  | O22  | 177.94(17) | O30  | Mn1B | O27B | 102.6(15)  |
| O18  | Fe1  | O6   | 177.03(17) | O34  | Mn2A | O33  | 111.5(2)   |
| O10  | Fe1  | O14  | 177.38(18) | O35  | Mn2A | O33  | 110.1(3)   |
| C3   | O2   | Fe1  | 132.0(4)   | O34  | Mn2A | O35  | 111.0(3)   |
| C7   | O6   | Fe1  | 133.6(4)   | O33  | Mn2A | O32A | 108.7(2)   |
| C11  | O10  | Fe1  | 133.7(4)   | O34  | Mn2A | O32A | 108.3(3)   |
| C15  | O14  | Fe1  | 130.5(4)   | O35  | Mn2A | O32A | 107.0(3)   |
| C19  | O18  | Fe1  | 131.7(4)   | O33  | Mn2B | O34  | 112.9(7)   |
| C23  | O22  | Fe1  | 131.8(4)   | O35  | Mn2B | O33  | 114.6(8)   |
| O2   | C3   | N4   | 121.6(6)   | O35  | Mn2B | O34  | 114.6(8)   |
| O2   | C3   | N5   | 118.8(6)   | O33  | Mn2B | O32B | 104.0(15)  |
| O6   | C7   | N8   | 122.1(6)   | O35  | Mn2B | O32B | 104.7(15)  |
| O6   | C7   | N9   | 118.3(6)   | O37  | Mn3A | O39  | 111.2(3)   |
| O10  | C11  | N12  | 122.0(6)   | O37  | Mn3A | O40  | 111.0(3)   |
| O10  | C11  | N13  | 119.0(6)   | O40  | Mn3A | O39  | 110.6(3)   |
| O14  | C15  | N16  | 122.2(6)   | O37  | Mn3A | O38A | 108.3(3)   |
| O14  | C15  | N17  | 118.4(6)   | O39  | Mn3A | O38A | 108.0(3)   |
| O18  | C19  | N21  | 119.4(6)   | O40  | Mn3A | O38A | 107.6(3)   |
| O18  | C19  | N20  | 121.5(6)   | O39  | Mn3B | O37  | 116.9(8)   |
| O22  | C23  | N25  | 119.6(6)   | O40  | Mn3B | O37  | 116.7(8)   |
| O22  | C23  | N24  | 121.3(6)   | O40  | Mn3B | O39  | 118.8(8)   |
| N4   | C3   | N5   | 119.5(6)   | O37  | Mn3B | O38B | 99.4(14)   |
| N8   | C7   | N9   | 119.6(6)   | O39  | Mn3B | O38B | 100.0(15)  |
| N12  | C11  | N13  | 119.0(6)   | O40  | Mn3B | O38B | 98.2(14)   |
| N17  | C15  | N16  | 119.3(6)   |      |      |      |            |
| N21  | C19  | N20  | 119.1(6)   |      |      |      |            |



**ESI Table S11.** Torsion angles (°) in compound **1**.

| <b>Atom</b> | <b>Atom</b> | <b>Atom</b> | <b>Atom</b> | <b>Torsion angle</b> |
|-------------|-------------|-------------|-------------|----------------------|
| Fe1         | O6          | C7          | N9          | 158.9(5)             |
| Fe1         | O2          | C3          | N5          | 157.1(5)             |
| Fe1         | O10         | C11         | N13         | 154.5(5)             |
| Fe1         | O14         | C15         | N17         | 156.9(5)             |
| Fe1         | O18         | C19         | N21         | 149.5(5)             |
| Fe1         | O22         | C23         | N25         | 148.6(5)             |
| Fe1         | O6          | C7          | N8          | -20.7(10)            |
| Fe1         | O2          | C3          | N4          | -21.1(9)             |
| Fe1         | O10         | C11         | N12         | -25.6(11)            |
| Fe1         | O14         | C15         | N16         | -24.6(10)            |
| Fe1         | O18         | C19         | N20         | -31.3(10)            |
| Fe1         | O22         | C23         | N24         | -30.6(10)            |

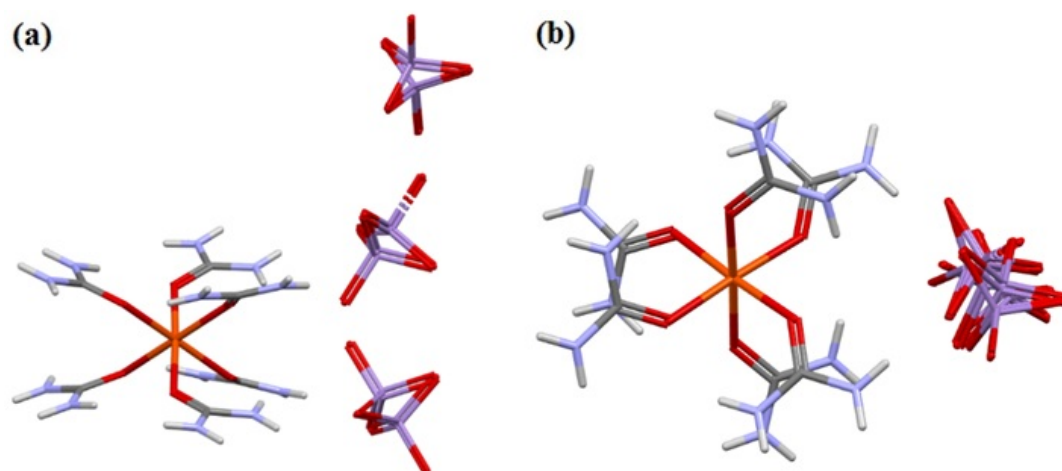

**ESI Figure S5.** Coordination geometry of the [hexakis(urea-O)iron(III)] tripermanganate. **(a)** shows alternate orientations of the three permanganate ions, referred to as 'up' and 'down'. In the figure, the major orientation 'A' is pointing upward. **(b)** is a view from an approximate orientation of the pseudo  $\bar{3}$  axes parallel to axis  $a$ .

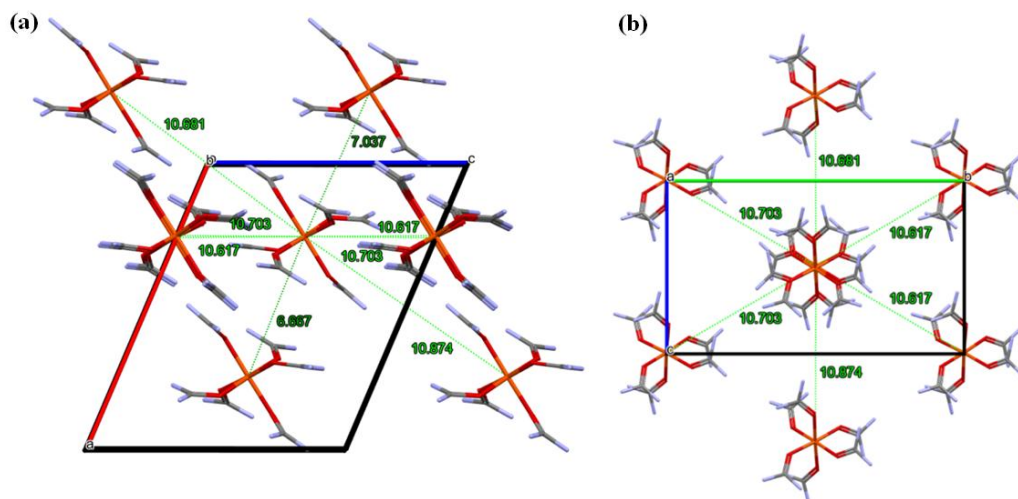

**ESI Figure S6.** The Fe $\cdots$ Fe distances in the structure. **a)** View along unit cell axis  $b$ . The vectors between the closest Fe-Fe atom pairs are parallel with unit cell axis  $a$ . **b)** The view along unit cell axis  $a$  shows the distances for pseudo pseudo  $\bar{3}$  axis related complexes surrounding the central complex. (The permanganate ions are not shown.)

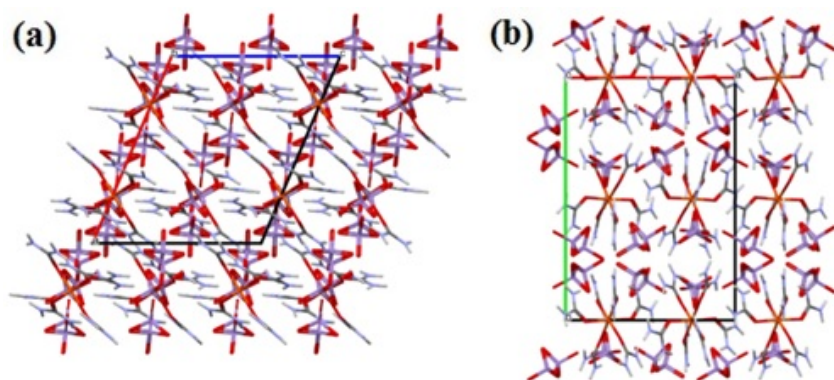

**ESI Figure S7.** Crystal packing of the complex. View along unit cell **a)** axis  $b$ , and **b)** axis  $c$ .

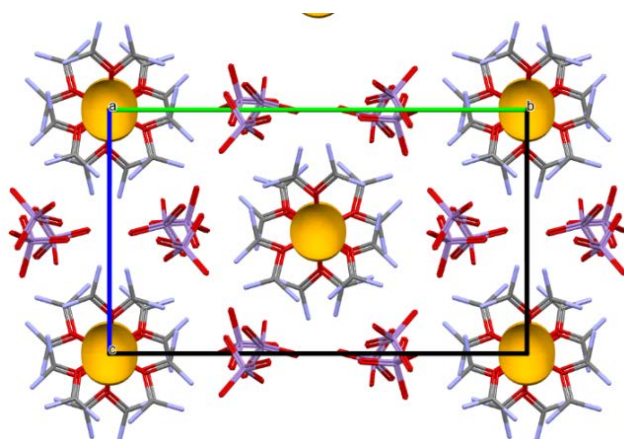

**ESI Figure S8.** Potential solvent-accessible voids in the unit cell of the complex. (The voids were calculated for the unit cell containing only the major orientation of the permanganate ions).

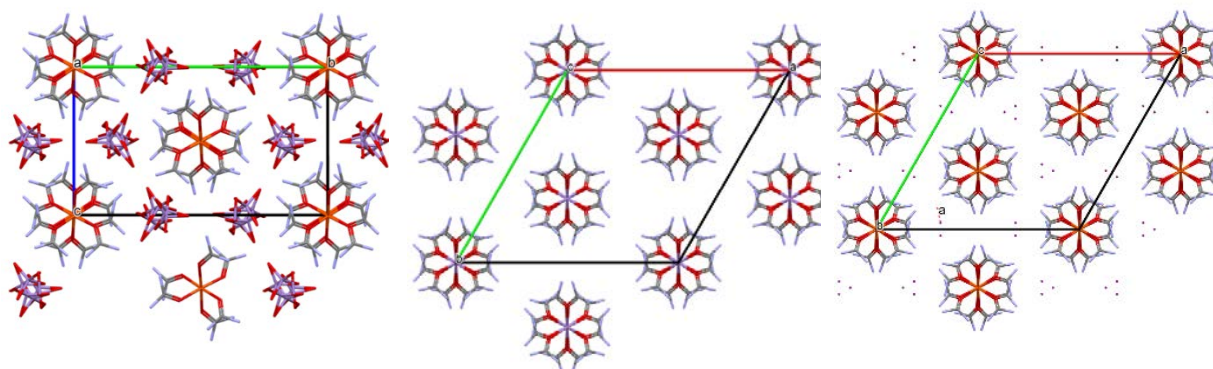

hexakis(urea)-iron(III)  
tris(permanganate) (compound 1)

hexakis(urea)-manganese(III)  
triperchlorate (CSD id: BOPWEI,  
space group:  $R\bar{3}c$ )

hexakis(urea)-iron(III) di-iodide  
(CSD id: WITQEV, space group:  
 $R\bar{3}$ )

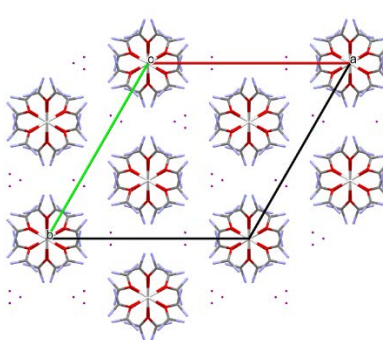

hexakis(urea)-scandium(III)  
tris(iodide) (CSD id: LIVVIY ,  
space group:  $R\bar{3}c$ )

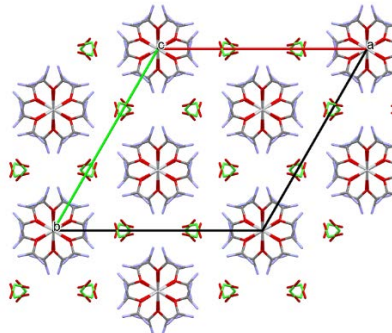

hexakis(urea)-titanium(III)  
triperchlorate (CSD id: TIUERA,  
space group:  $R\bar{3}c$ )

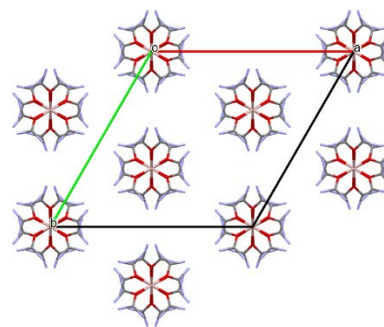

hexakis(urea-O)-aluminium  
perchlorate (CSD id: URALPC,  
space group:  $R\bar{3}c$ )

**ESI Figure S9.** Crystal packing of compound **1** compared to some structures with similar packing topologies. Space group symmetries and CSD [30] reference codes are listed.

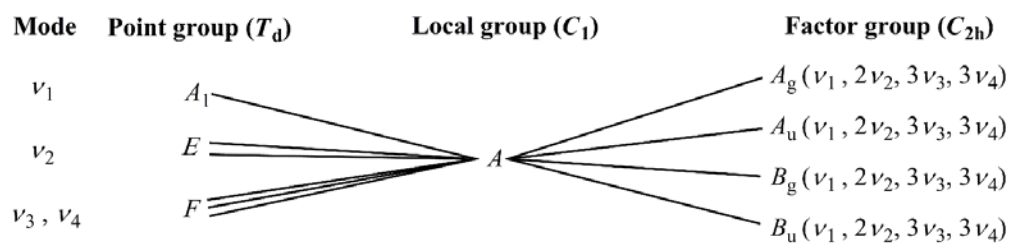

**ESI Figure S10.** The four normal modes of the tetrahedral permanganate anions in compound

**1**

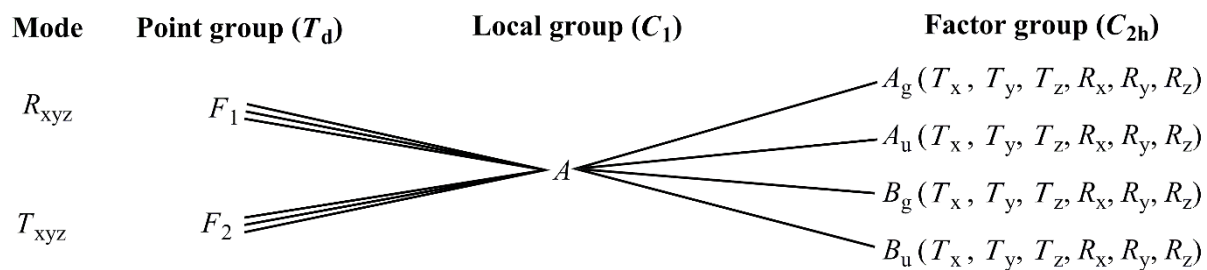

**ESI Figure S11.** The external modes of permanganate ion in compound **1**.



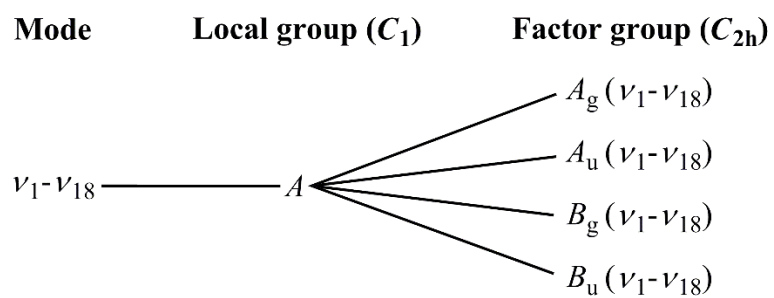

**ESI Figure S12.** The normal modes of urea in compound **1**.

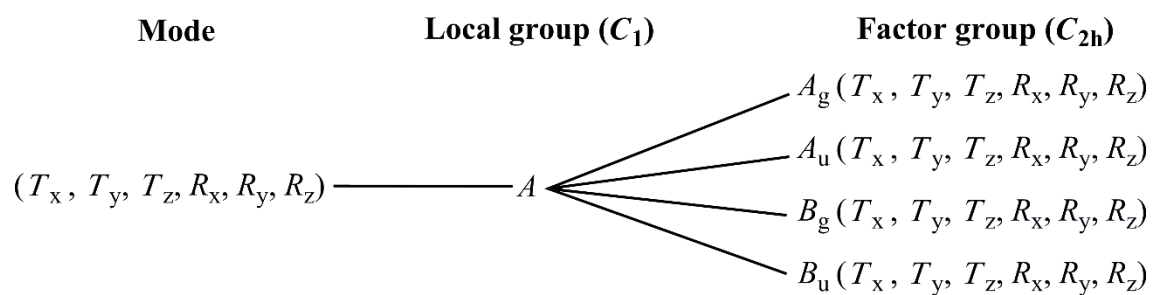

**ESI Figure S13.** The external modes of urea in compound 1.

**ESI Table S12.** The assignments of the vibrational modes of Compound 1.

| [Fe(urea-O) <sub>6</sub> ](MnO <sub>4</sub> ) <sub>3</sub> |                             |                 |                   | Solid urea<br>[37] | Gaseous<br>urea [37] | Assignment                                                                                                                         |
|------------------------------------------------------------|-----------------------------|-----------------|-------------------|--------------------|----------------------|------------------------------------------------------------------------------------------------------------------------------------|
| IR,<br>298 K                                               | IR,<br>100 K                | Raman,<br>298 K | Raman,<br>123 K   | IR                 | IR                   |                                                                                                                                    |
| 3469s,<br>3455sh                                           | 3472s,<br>3443m,<br>3415s   | -               | 3400vw            | 3450,344<br>4      | 3548,<br>3548        | $\nu_{as}(\text{NH}_2)$                                                                                                            |
| 3364m,<br>3348m                                            | 3367m,<br>3341m             | 3340w           | 3339w             | 3349,334<br>1      | 3442,3437            | $\nu_s(\text{NH}_2)$                                                                                                               |
| 3231w,<br>3182vw,<br>3129vw                                | 3232w,<br>3147vw,<br>3124vw |                 |                   |                    |                      |                                                                                                                                    |
| <1682*                                                     | <1681*                      | 1679m           | 1673m             | 1683               | 1592                 | $\delta_s(\text{NH}_2)$                                                                                                            |
| 1628vs                                                     | 1626vs                      | 1622vw          | 1622vw            | 1625               | 1603                 | $\delta_{as}(\text{NH}_2)$                                                                                                         |
| 1549s,1533<br>s, 1503m                                     | 1550s,<br>1532s,<br>1509m   | 1545w,<br>1501w | 1545vw,15<br>01vw | 1601               | 1735                 | $\nu(\text{C}=\text{O})$                                                                                                           |
| 1465vw,14<br>46w,                                          | 1476vw,146<br>5w,           |                 |                   | 1466               | 1388                 | $\nu_{as}(\text{C}-\text{N})$                                                                                                      |
| 1406w,136<br>1vw                                           | 1403w                       | 1388w,135<br>2w | 1387,1358         |                    |                      | Two-phonon<br>bands, $\nu_s(\text{CN})+$<br>$\omega_{as}(\text{NH}_2);$<br>$\rho_{as}(\text{NH}_2)+$<br>$\omega_{as}(\text{NH}_2)$ |
| 1143m                                                      | 1145m                       | 1138vw          | 1138vw            | 1153               | 1155                 | $\rho_s(\text{NH}_2)$                                                                                                              |
| 1036m                                                      | 1039m                       | 1068w,<br>1041w | 1070w,104<br>0w   | 1057               | 1029                 | $\rho_{as}(\text{NH}_2)$                                                                                                           |
| -                                                          | -                           | -               | -                 | 1003               | 936                  | $\nu_s(\text{CN})$                                                                                                                 |
| 772vs,760v<br>w                                            | 777vs,760vw                 | 774s, 760s      | 774s,759s         | 789                | 786                  | $\pi(\text{CO})$                                                                                                                   |

|                                                                 |                                                    |                                             |                                             |     |     |                     |
|-----------------------------------------------------------------|----------------------------------------------------|---------------------------------------------|---------------------------------------------|-----|-----|---------------------|
| 680vw                                                           | 711vw,689vw                                        | 680sh                                       | 680sh                                       | 721 | 517 | $\tau_{as}(NH)$     |
| 611w,<br>572vw                                                  | 611w,<br>581vw                                     | 612s,588m                                   | 614vs                                       | 569 | 568 | $\delta(C=O)$       |
| 537w                                                            | 545w                                               | 540sh,480w                                  | 538sh,<br>481w                              | 530 | 467 | $\delta(C-N)$       |
| 476sh,<br>468w,<br>441vw,<br>430sh,<br>407sh,<br>395w           | 440vw,<br>418vw,414vw                              |                                             |                                             | 509 | 423 | $\omega_{as}(NH_2)$ |
| 317w,<br>285sh,<br>247w,<br>189vw,<br>168vw,<br>124vw,<br>110vw | 307w, 240w,<br>209sh,<br>190vw,<br>160vw,<br>131vw | 307w,<br>211sh,<br>197sh,<br>160sh,<br>120w | 306w,<br>213sh,<br>198sh,<br>165sh,<br>119m |     |     |                     |

vs-very strong; s-strong; m-medium; w-weak; vw-very weak; sh-shoulder

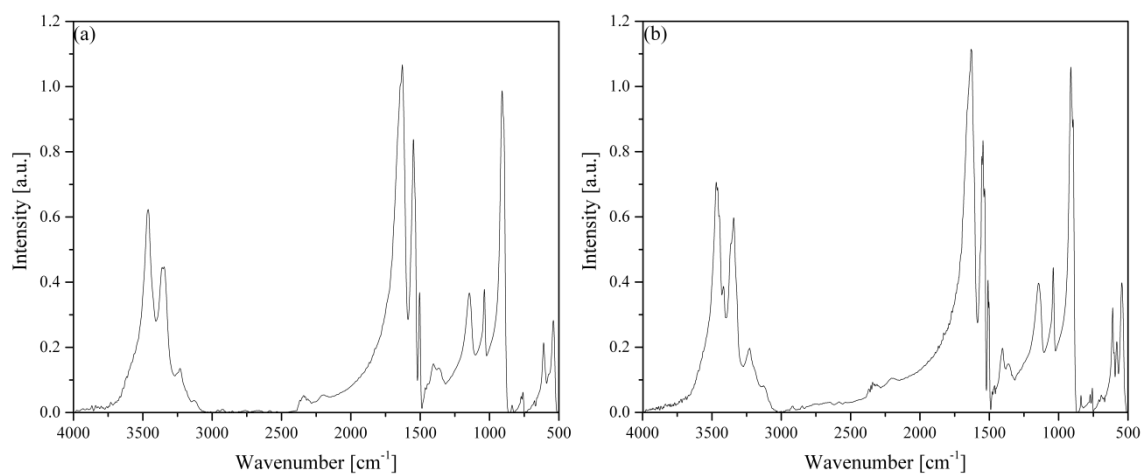

**ESI Figure 14.** The (a) room temperature and (b) liquid nitrogen temperature IR spectra of compound **1**.

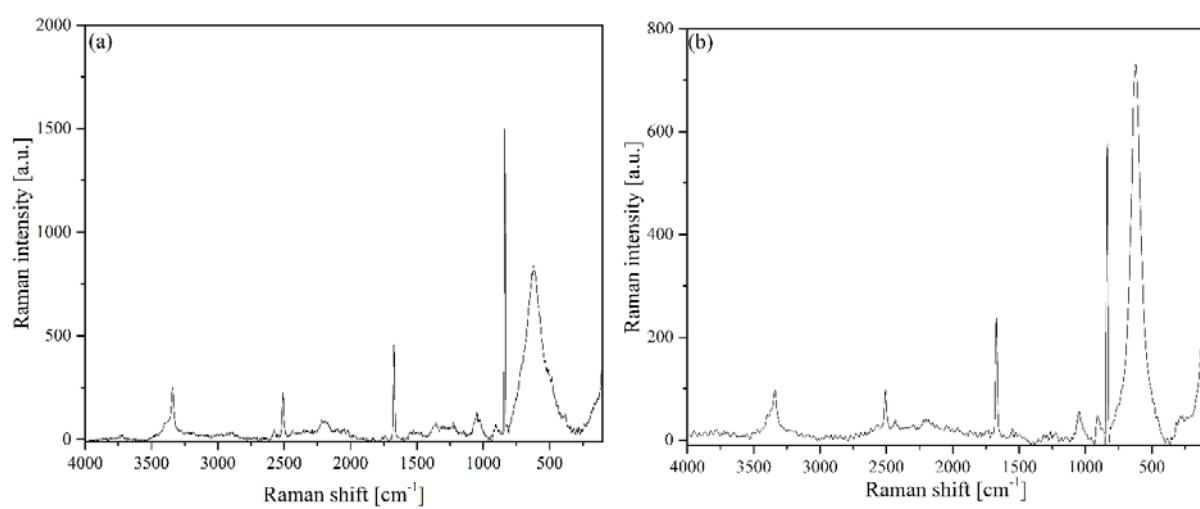

**ESI Figure 15.** The (a) room temperature and (b) liquid nitrogen temperature Raman spectra of compound **1**.

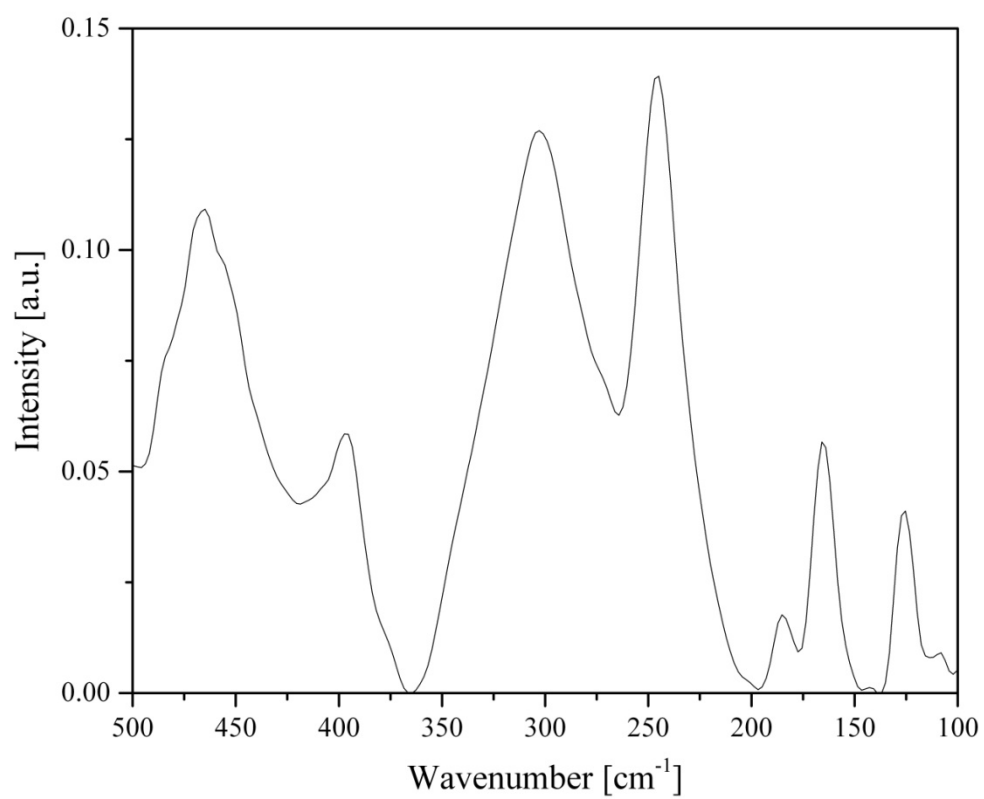

**ESI Figure S16.** The far-IR spectrum of compound **1** at room temperature.

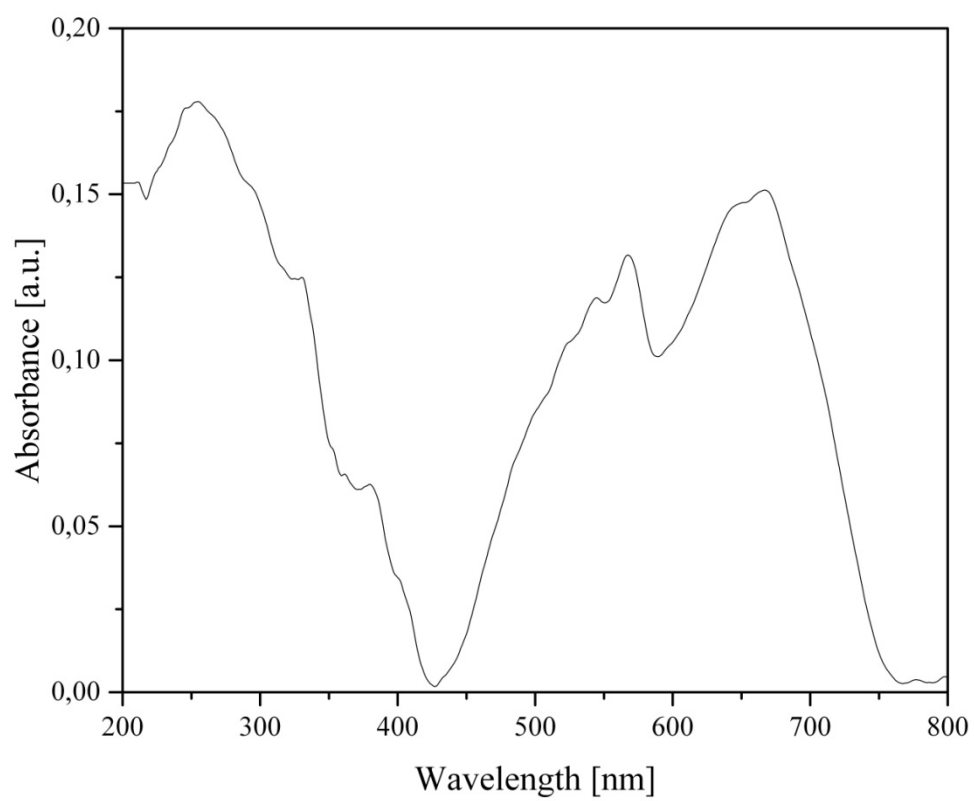

**ESI Figure S17.** The UV-VIS spectrum of compound **1**.



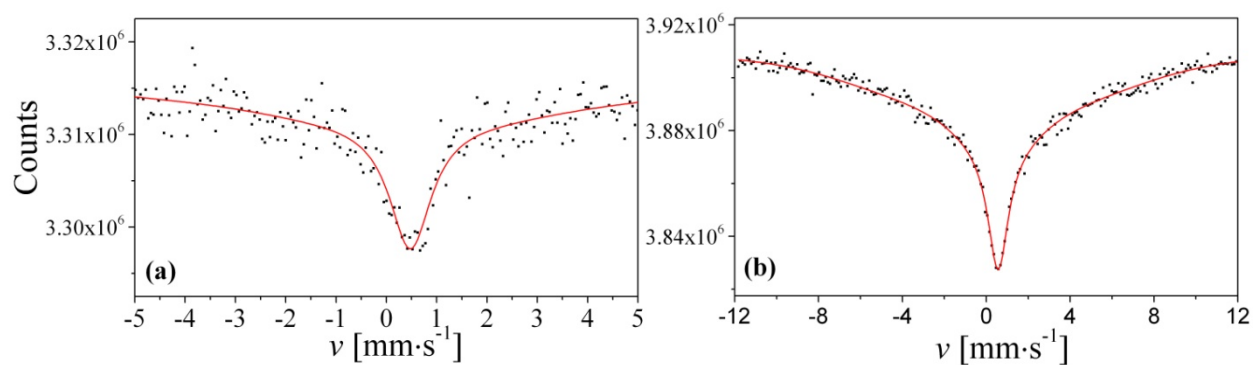

**ESI Figure S18.** The (a) room temperature and (b) liquid nitrogen temperature Mössbauer spectra of compound **1**.

**ESI Table S13.** The DFT-optimized structure of the [hexakis(urea-O)iron(III)] cation in Cartesian coordinates (Å).

| Coordinates from ORCA-job<br>Fe3-urea6-BP86-opt-CPCM |             |             |             |
|------------------------------------------------------|-------------|-------------|-------------|
| Fe                                                   | 0.000000000 | 0.000000000 | 0.000000000 |
| O                                                    | 0,1501592   | 1,688254    | 1,1282739   |
| N                                                    | -0,4893589  | 3,7807622   | 1,7056743   |
| H                                                    | 0,4314895   | 4,11429     | 1,4425539   |
| H                                                    | -1,1563015  | 4,4456425   | 2,0849273   |
| N                                                    | -1,9947976  | 2,0137439   | 1,8555892   |
| H                                                    | -2,1593912  | 1,0075772   | 1,7751994   |
| H                                                    | -2,729803   | 2,6158073   | 2,2122068   |
| C                                                    | -0,7760933  | 2,4795998   | 1,5590944   |
| O                                                    | -1,5294606  | -0,712546   | 1,1327544   |
| N                                                    | -3,0264372  | -2,3086598  | 1,7073403   |
| H                                                    | -3,7735338  | -1,6787962  | 1,435906    |
| H                                                    | -3,2719103  | -3,2216052  | 2,0768989   |
| N                                                    | -0,7450765  | -2,7364822  | 1,8561546   |
| H                                                    | 0,2097908   | -2,3788912  | 1,7792939   |
| H                                                    | -0,9018713  | -3,6738619  | 2,2122156   |
| C                                                    | -1,7548529  | -1,9103182  | 1,5606227   |
| O                                                    | 1,3841122   | -0,9677778  | 1,1310949   |
| N                                                    | 3,5152294   | -1,4640144  | 1,7053047   |
| H                                                    | 3,3482633   | -2,4229523  | 1,4201549   |
| H                                                    | 4,4284851   | -1,2195555  | 2,0751194   |
| N                                                    | 2,7389297   | 0,7231968   | 1,8650017   |
| H                                                    | 1,9483999   | 1,3680418   | 1,7925622   |
| H                                                    | 3,6262416   | 1,0559286   | 2,22864     |
| C                                                    | 2,5328354   | -0,5633154  | 1,562215    |
| O                                                    | -0,1506676  | -1,6882608  | -1,1278224  |
| N                                                    | 0,4885096   | -3,7810914  | -1,7045898  |
| H                                                    | -0,4335259  | -4,1138192  | -1,4446554  |
| H                                                    | 1,1559681   | -4,4464261  | -2,0821433  |
| N                                                    | 1,9952812   | -2,0149747  | -1,851668   |
| H                                                    | 2,1594615   | -1,0086858  | -1,7721778  |
| H                                                    | 2,7293577   | -2,616608   | -2,2109439  |
| C                                                    | 0,7756316   | -2,4801486  | -1,5574916  |
| O                                                    | 1,5286504   | 0,7128971   | -1,132443   |
| N                                                    | 3,0253527   | 2,3082649   | -1,7098952  |
| H                                                    | 3,7728419   | 1,6762838   | -1,4445765  |
| H                                                    | 3,270551    | 3,2195472   | -2,0837301  |
| N                                                    | 0,7439647   | 2,7369711   | -1,8552964  |
| H                                                    | -0,2108813  | 2,3793432   | -1,7778872  |
| H                                                    | 0,9007269   | 3,6730442   | -2,2148415  |
| C                                                    | 1,753856    | 1,910324    | -1,5615506  |
| O                                                    | -1,3848977  | 0,9678629   | -1,1301427  |
| N                                                    | -3,5155171  | 1,4644733   | -1,7057986  |
| H                                                    | -3,3467945  | 2,4246323   | -1,4258616  |
| H                                                    | -4,4284487  | 1,2202363   | -2,076561   |
| N                                                    | -2,7407531  | -0,7235488  | -1,8613457  |
| H                                                    | -1,9504402  | -1,3686325  | -1,7886443  |
| H                                                    | -3,6272654  | -1,0555024  | -2,227681   |
| C                                                    | -2,5336768  | 0,5634809   | -1,5611084  |

**ESI Table S14.** The Mössbauer parameters of compound **1** obtained with the Blume-Tjon model.

|                                                  | [Fe(urea) <sub>6</sub> ](MnO <sub>4</sub> ) <sub>3</sub> |                 |
|--------------------------------------------------|----------------------------------------------------------|-----------------|
| <i>T</i> (K)                                     | <b>298</b>                                               | <b>80</b>       |
| $\delta$ (mm·s <sup>-1</sup> )                   | 0.412 (± 0.024)                                          | 0.501 (± 0.023) |
| <i>B</i> (T)                                     | 45 (± 7.1)                                               | 49 (± 2.5)      |
| $V_{zz}$ (·10 <sup>21</sup> v·m <sup>-2</sup> )* | -0.762                                                   | -0.762          |
| <i>ETA</i> *                                     | 0.232                                                    | 0.232           |
| <i>Jump up rate</i>                              | 8.40 (± 0.15)                                            | 8.57 (± 0.03)   |
| $\Gamma$ (mm·s <sup>-1</sup> )                   | 0.626 (± 0.091)                                          | 0.875 (± 0.034) |

\* **Fixed parameters**

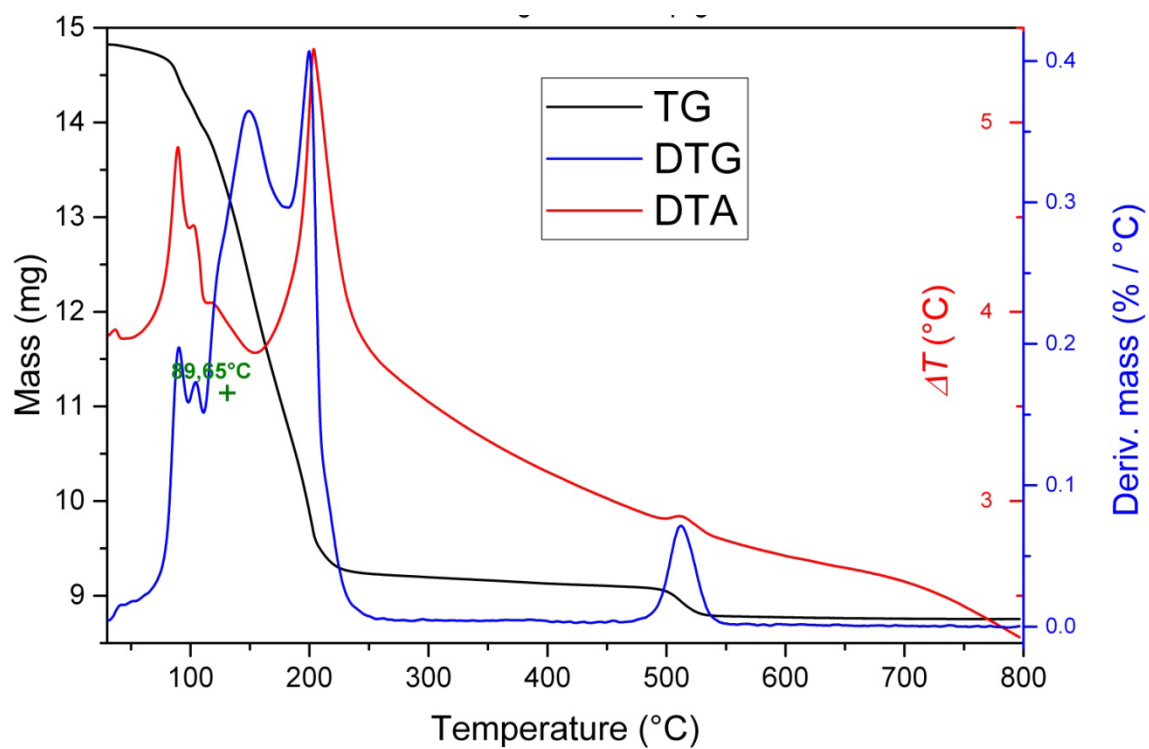

ESI figure S19. TG-DTG curve of compound **1** in air.

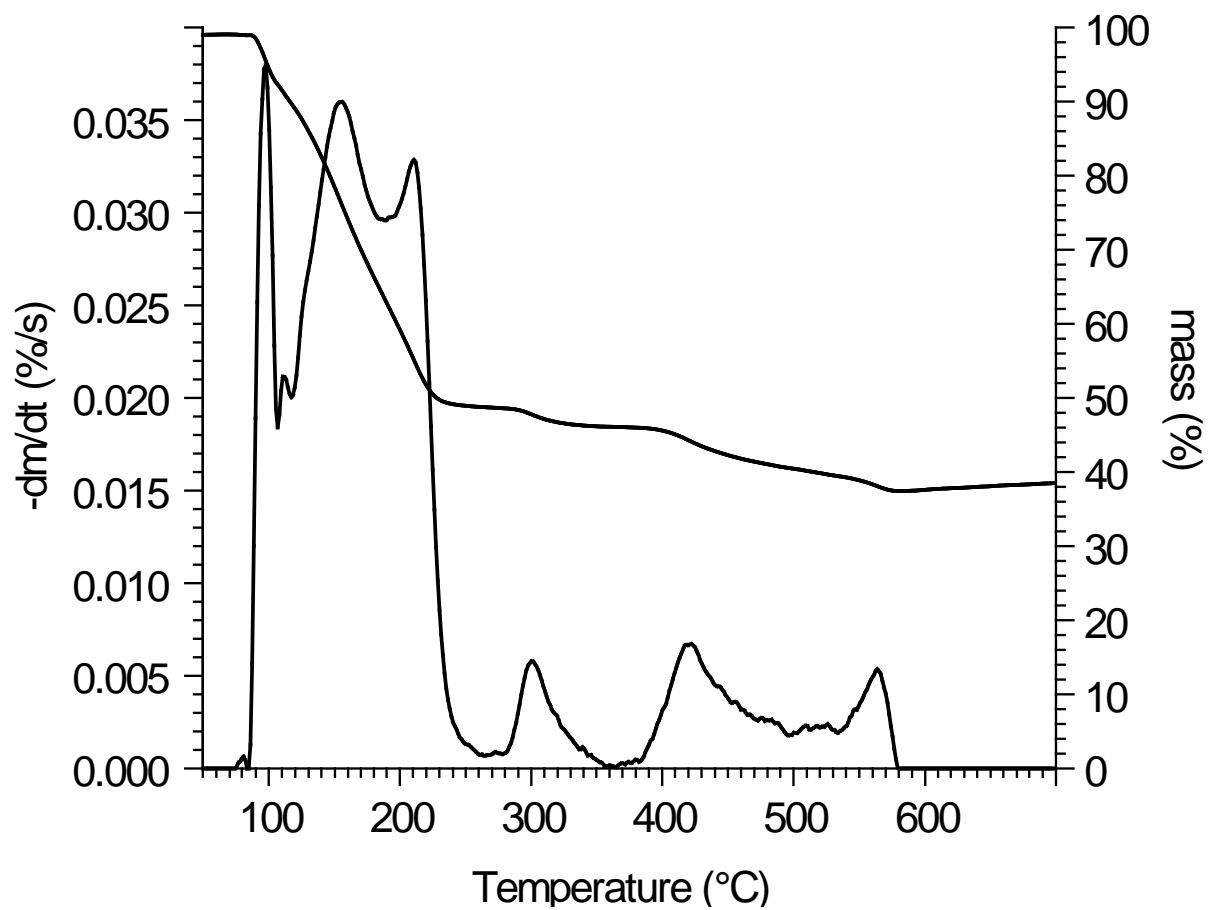

ESI figure S20. TG-DTG curve of compound 1 in Ar.

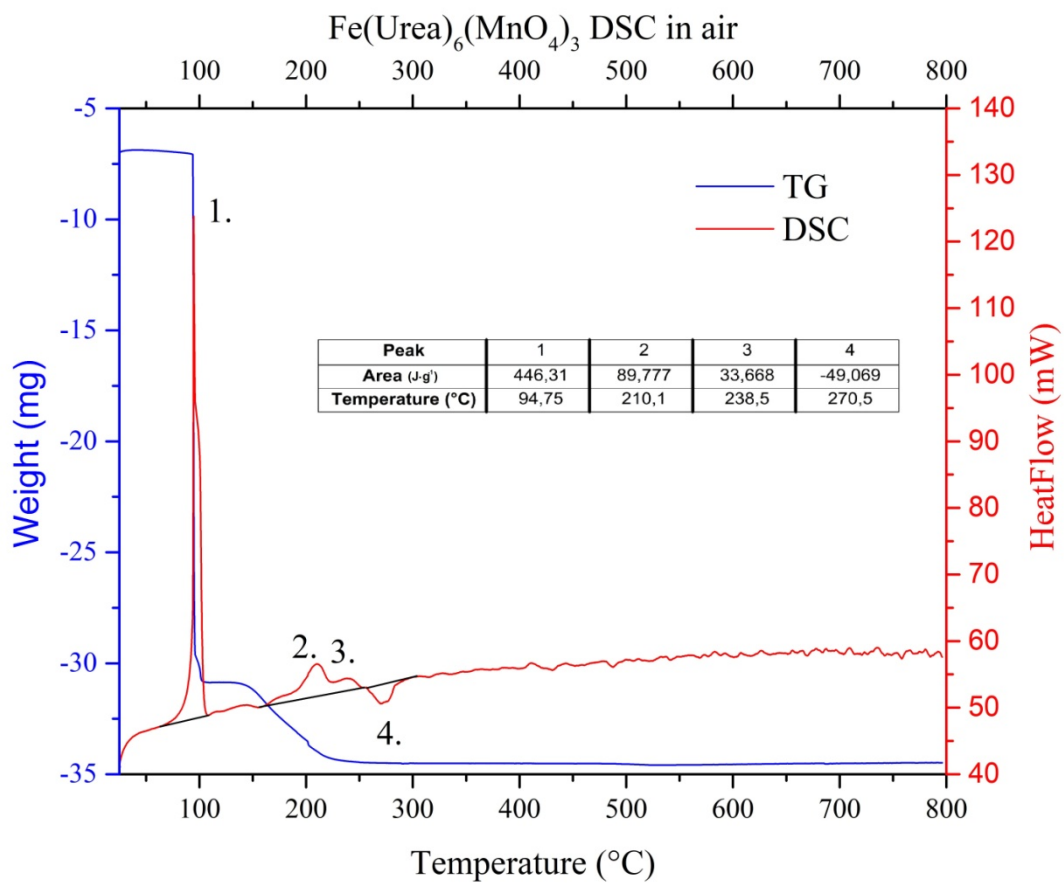

**ESI figure S21.** DSC curve of compound **1** in air.

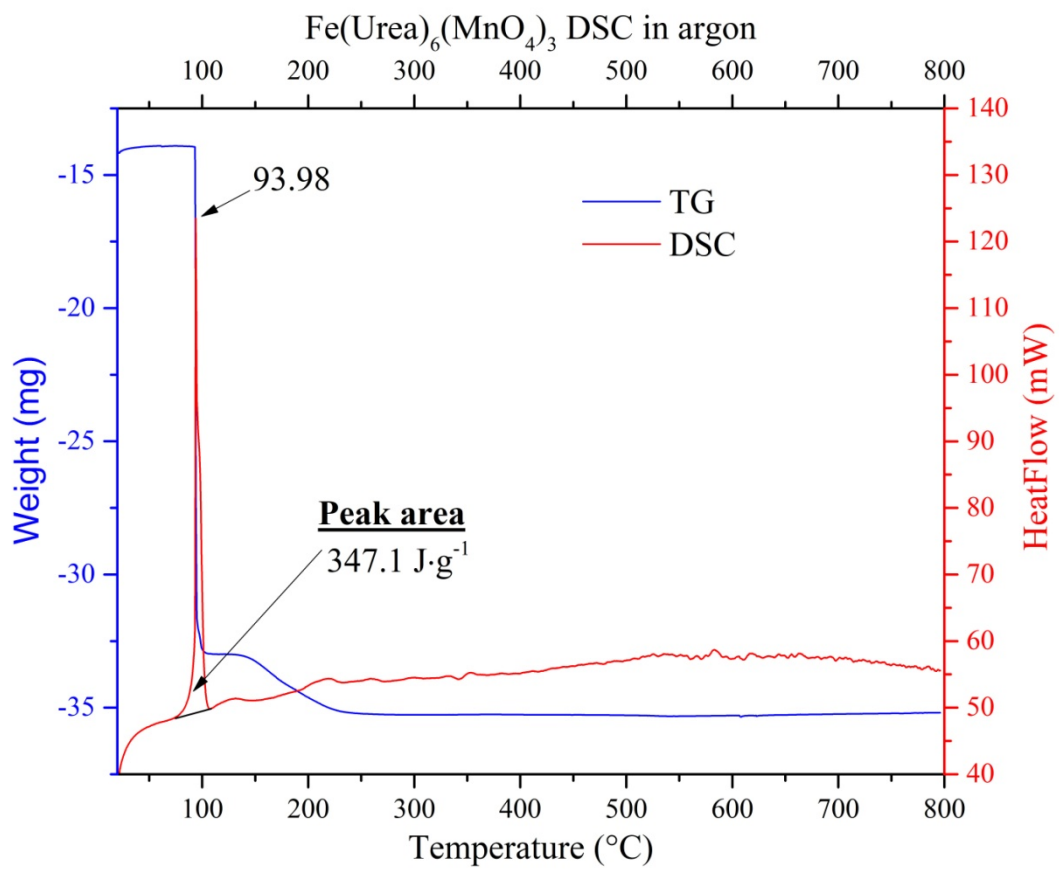

**ESI figure S22.** DSC curve of compound **1** in argon.

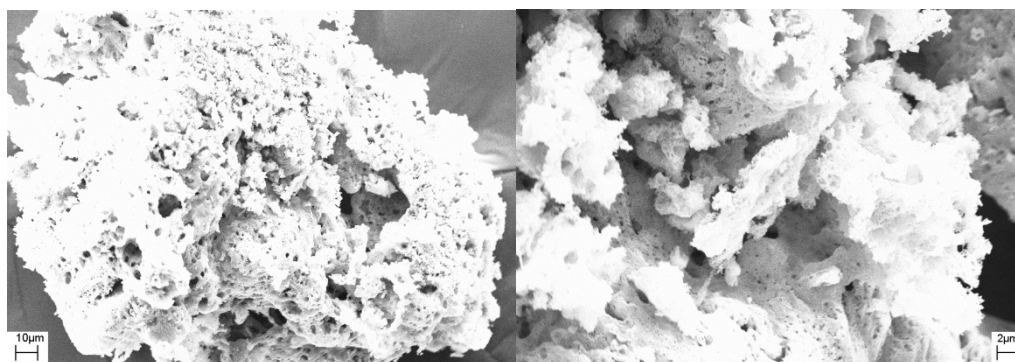

**ESI Figure S23.** The SEM image of decomposition product formed from Compound **1** after heating at 800 °C in air.



**ESI Table S15.** The Mössbauer parameters of the intermediate phases formed at 550 °C (30 min), 800 °C (30 min) and 800 °C (24 h) in air.

| <i>Component</i>               | 550 °C             |                   |                     |     | 800 °C – 30 min    |                   |                     |                   | 800 °C – 24 h      |                   |                     |                    |
|--------------------------------|--------------------|-------------------|---------------------|-----|--------------------|-------------------|---------------------|-------------------|--------------------|-------------------|---------------------|--------------------|
|                                | <b>Bixbyite I.</b> |                   | <b>Bixbyite II.</b> |     | <b>Bixbyite I.</b> |                   | <b>Bixbyite II.</b> |                   | <b>Bixbyite I.</b> |                   | <b>Bixbyite II.</b> |                    |
| <i>Doublet</i>                 | I.                 | II.               | I.                  | II. | I.                 | II.               | I.                  | II.               | I.                 | II.               | I.                  | II.                |
| <b>Relative area (%)</b>       | 27.41              | 72.59             | ---                 | --- | 37.16              | 49.64             | 6.19                | 7.01              | 17.41              | 26,47             | 20.99               | 35.13              |
| $\delta$ (mm·s <sup>-1</sup> ) | 0.349<br>(±0.003)  | 0.368<br>(±0.001) | ---                 | --- | 0.350<br>(±0.002)  | 0.378<br>(±0.001) | 0.363<br>(±0.009)   | 0.373<br>(±0.003) | 0.357<br>(±0.003)  | 0.376<br>(±0.003) | 0.358<br>(±0.003)   | 0.3745<br>(±0.002) |
| $\Delta$ (mm·s <sup>-1</sup> ) | 0.578<br>(±0.011)  | 1.153<br>(±0.006) | ---                 | --- | 0.453<br>(±0.023)  | 1.151<br>(±0.014) | 0.687<br>(±0.107)   | 1.418<br>(±0.018) | 0.365<br>(±0.068)  | 1.018<br>(±0.047) | 0.564<br>(±0.085)   | 1.296<br>(±0.034)  |
| $\Gamma$ (mm·s <sup>-1</sup> ) | 0.350<br>(±0.014)  | 0.418<br>(±0.007) | ---                 | --- | 0.347<br>(±0.012)  | 0.368<br>(±0.010) | 0.316<br>(±0.187)   | 0.219<br>(±0.032) | 0.243<br>(±0.055)  | 0.296<br>(±0.085) | 0.263<br>(±0.101)   | 0.297<br>(±0.027)  |

**ESI table S16.** The Mössbauer parameters of the decomposition product formed from compound **1** at 800 °C in inert atmosphere.

| <i>Component</i>               | <b>Doublet I.</b> | <b>Doublet II.</b> | <b>Doublet III.</b> | <b>Doublet IV.</b> |
|--------------------------------|-------------------|--------------------|---------------------|--------------------|
| <i>Relative area</i> (%)       | 45.25             | 23.57              | 23.66               | 7.52               |
| $\delta$ (mm·s <sup>-1</sup> ) | 1.077 (±0.004)    | 1.096 (±0.051)     | 0.177 (±0.064)      | 0.441 (±0.034)     |
| $\Delta$ (mm·s <sup>-1</sup> ) | 0.415 (±0.019)    | 0.817 (±0.125)     | 0.397 (±0.038)      | 0.517 (±0.104)     |
| $\Gamma$ (mm·s <sup>-1</sup> ) | 0.382 (±0.023)    | 0.543 (±0.049)     | 0.638 (±0.051)      | 0.338 (±0.144)     |

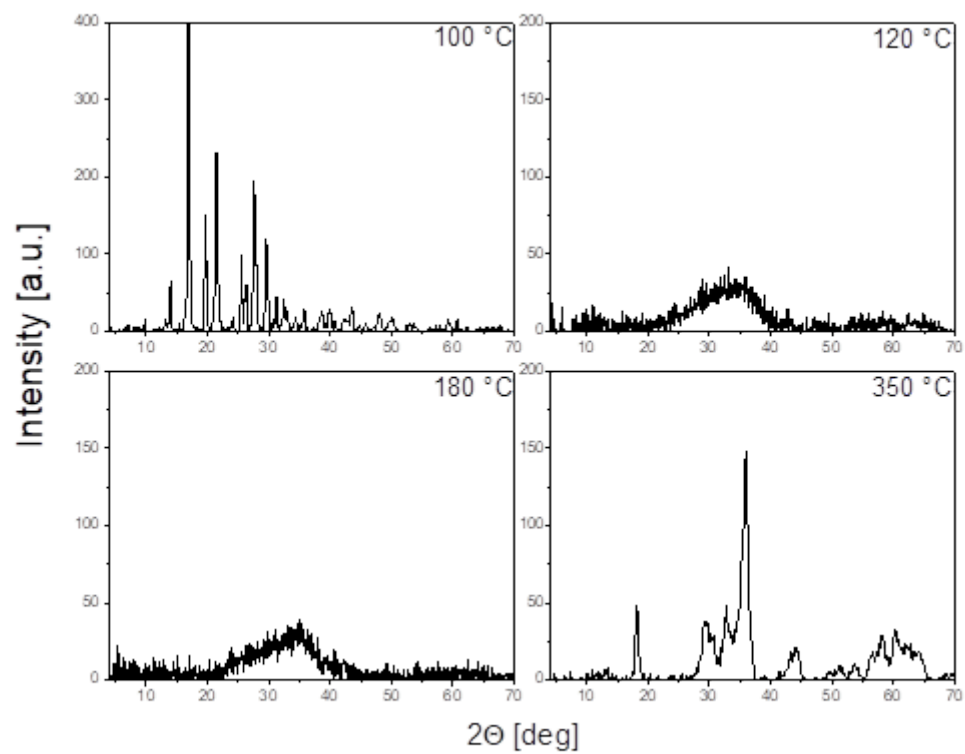

**ESI figure S24.** XRD patterns of the decomposition products of compound **1** in air between 120 °C and 350 °C.

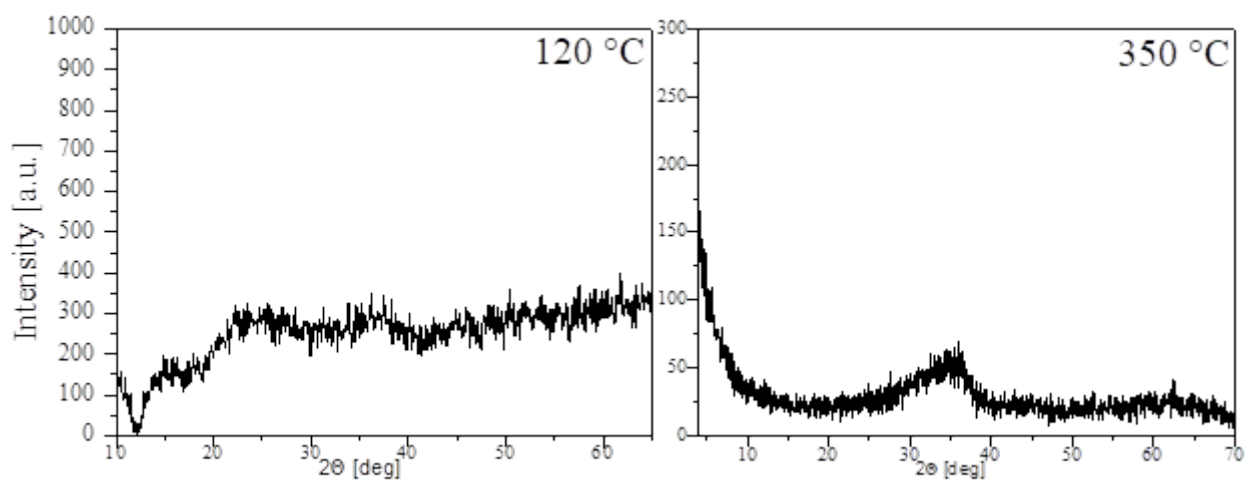

**ESI figure S25.** XRD patterns of the decomposition products of compound **1** in inert atmosphere at 120 °C and 350 °C.

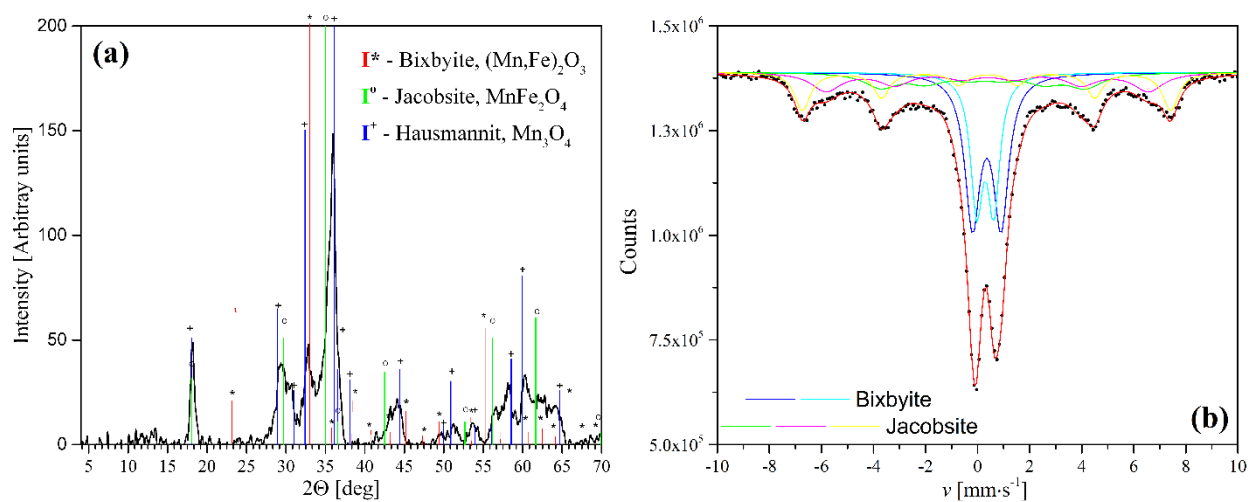

**ESI S26.** The (a) powder XRD and (b) Mössbauer spectrum of the decomposition product formed from compound **1** after heating at 350 °C in air.

**ESI table S17.** Mössbauer parameters of the intermediary phases formed at 350 °C in air.

| <b><i>Component</i></b>                          | <b>Doublet I.</b> | <b>Doublet II.</b> | <b>Magnetic I.</b> | <b>Magnetic II.</b> | <b>Magnetic III.</b> |
|--------------------------------------------------|-------------------|--------------------|--------------------|---------------------|----------------------|
| <b><i>Relative area</i></b><br>(%)               | 31.25             | 21.99              | 13.85              | 15.69               | 16.89                |
| <b><math>\delta</math></b> (mm·s <sup>-1</sup> ) | 0.352<br>(±0.001) | 0.292<br>(±0.001)  | 0.249<br>(±0.009)  | 0.385<br>(±0.006)   | 0.374<br>(±0.002)    |
| <b><math>\Delta</math></b> (mm·s <sup>-1</sup> ) | 1.099<br>(±0.005) | 0.658<br>(±0.003)  | -0.075<br>(±0.017) | -0.024<br>(±0.012)  | -0.059<br>(±0.004)   |
| <b><math>\Gamma</math></b> (mm·s <sup>-1</sup> ) | 0.702<br>(±0.003) | 0.554<br>(±0.004)  | 1.58<br>(±0.04)    | 1.38<br>(±0.03)     | 0.727<br>(±0.009)    |
| <b><i>B</i></b> (T)                              | ---               | ---                | 24.4 (±0.07)       | 38.5(±0.07)         | 44.0 (±0.02)         |

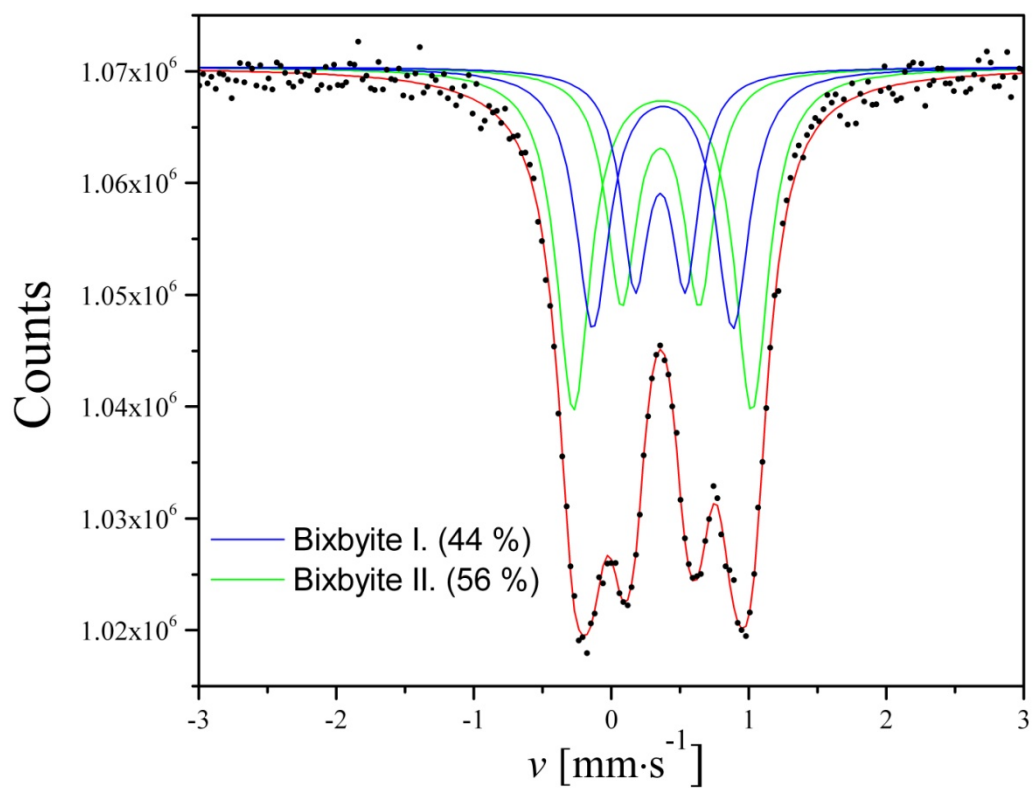

**ESI Figure S27.** Room temperature Mössbauer spectrum of the material that formed upon heat treatment at 800 °C in air for 24 h.

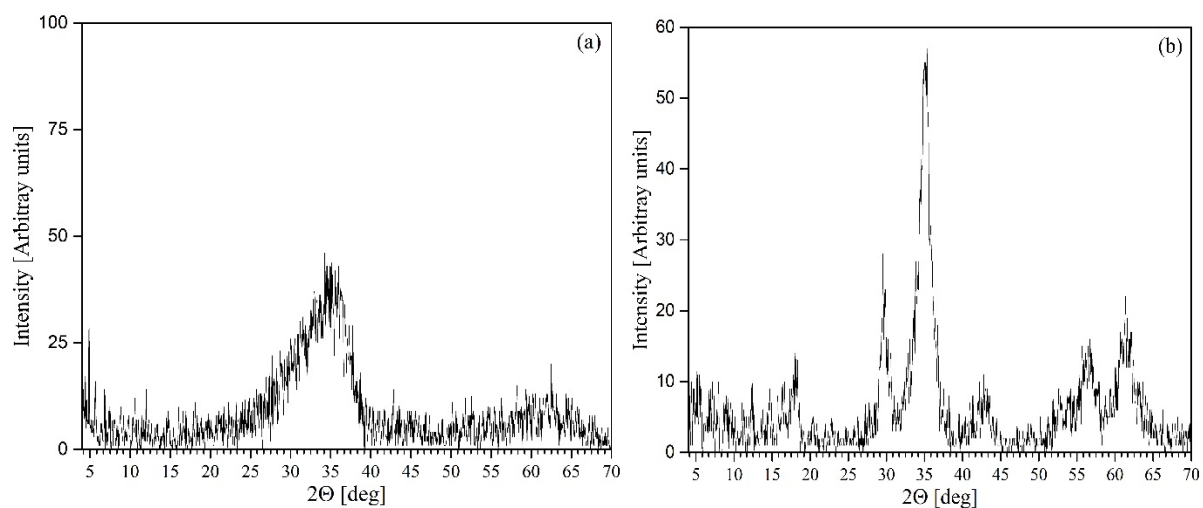

**ESI Figure S28.** Powder XRD of the (a) freshly prepared an (b) one week old (stored at room temperature in air) intermediary phases formed at 350 °C in inert atmosphere.



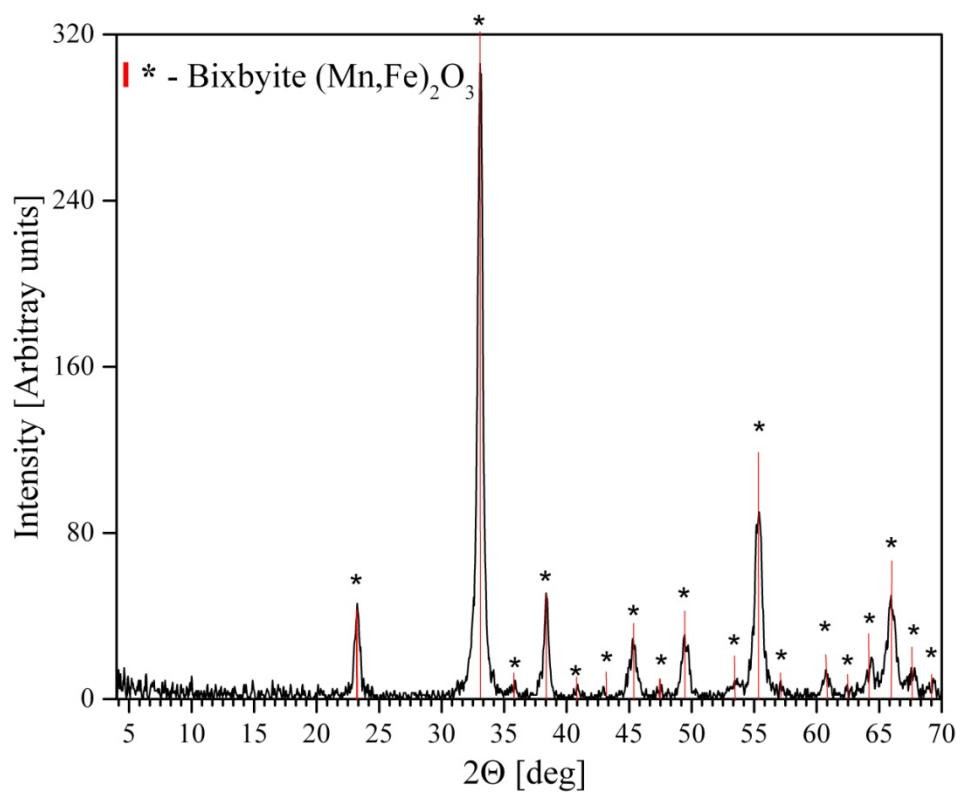

**ESI Figure S29.** Powder XRD of the intermediary phases formed at 550 °C in air.

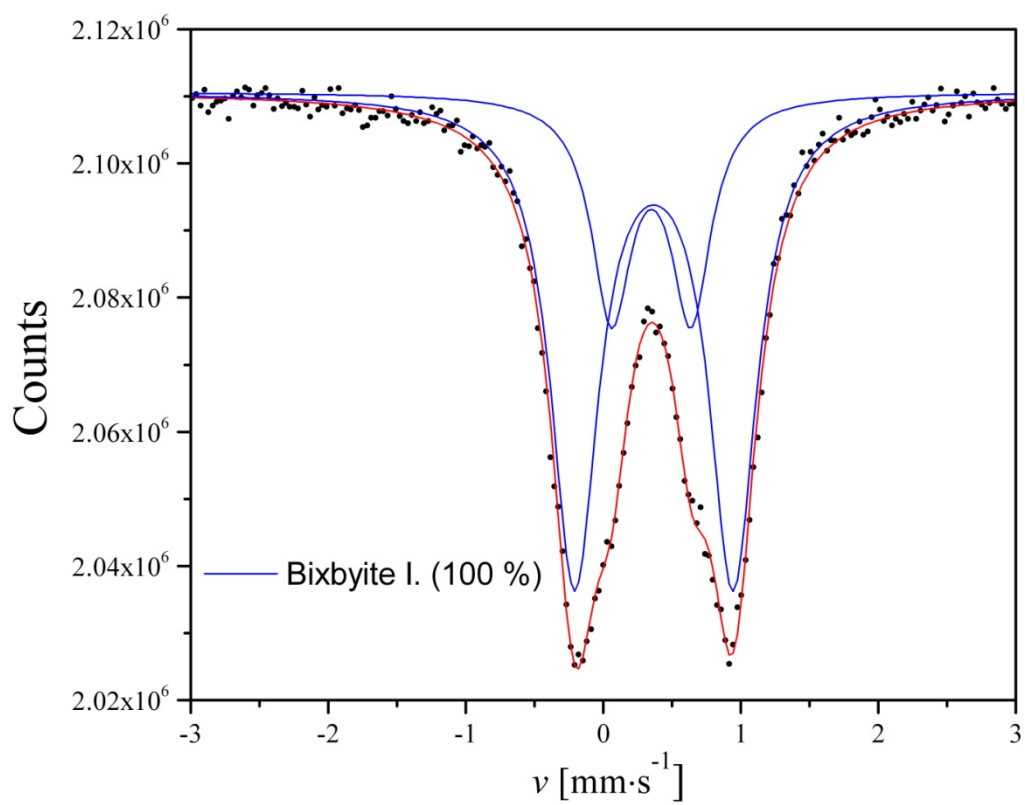

**ESI Figure S30.** Room temperature Mössbauer spectrum of the intermediary phases formed upon heat treatment at 550 °C in air.

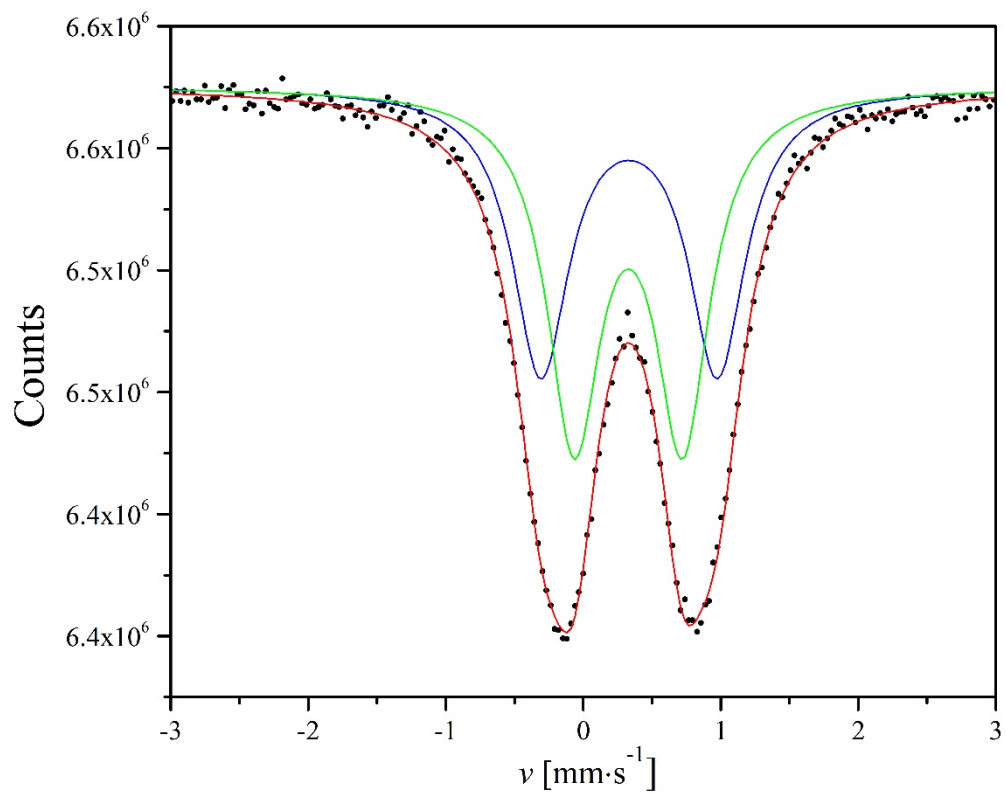

**ESI Figure S31.** Room temperature Mössbauer spectrum of the intermediary phases formed at 350 °C in inert atmosphere.

**ESI Table S18.** The Mössbauer parameters of the of the intermediary phases formed at 350 °C in inert atmosphere.

| <b><i>Component</i></b>                          | <b>Doublet I.</b> | <b>Doublet II.</b> |
|--------------------------------------------------|-------------------|--------------------|
| <b><i>Relative area</i></b> (%)                  | 46.29             | 53.71              |
| <b><math>\delta</math></b> (mm·s <sup>-1</sup> ) | 0.333 (±0.002)    | 0.328 (±0.002)     |
| <b><math>\Delta</math></b> (mm·s <sup>-1</sup> ) | 1.283 (±0.020)    | 0.789 (±0.002)     |
| <b><math>\Gamma</math></b> (mm·s <sup>-1</sup> ) | 0.498 (±0.015)    | 0.473 (±0.012)     |

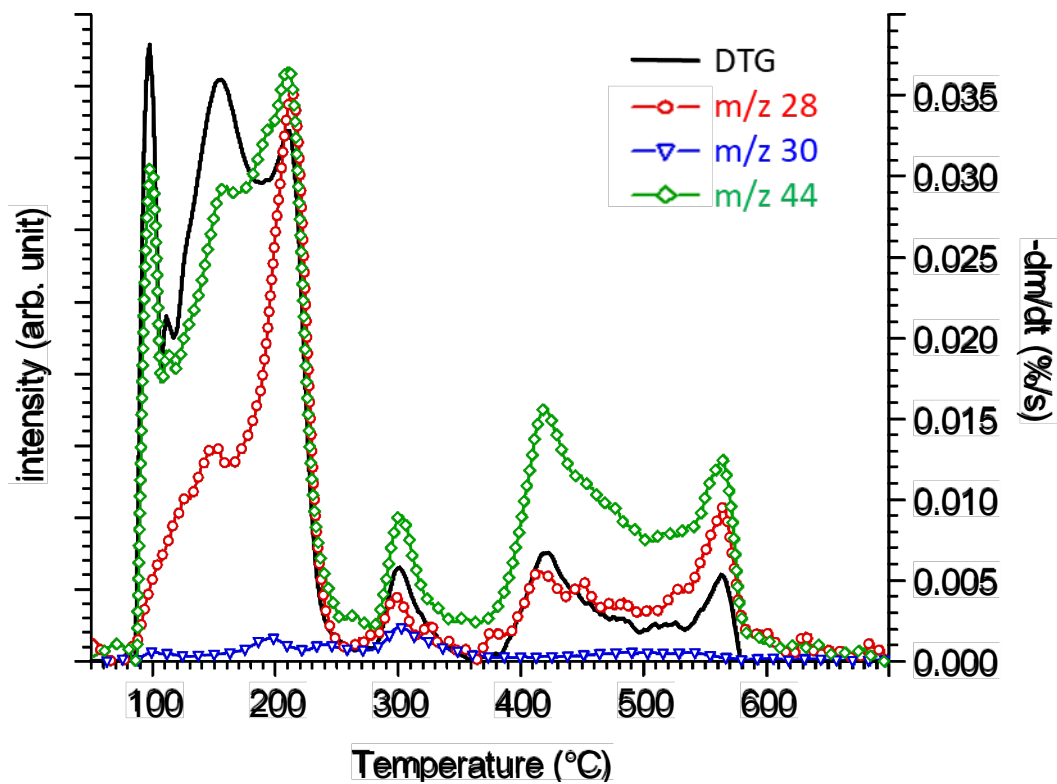

**ESI Figure S32.** The TG-MS ion curves showing  $m/z = 28$  (CO, N<sub>2</sub>),  $m/z = 30$  (NO) and  $m/z = 44$  (CO<sub>2</sub>).

**ESI Table S19.** Elemental composition of the decomposition product formed from compound **1** after heating at 800 °C in inert atmosphere (given in atomic %).

| <b>Fe (%)</b> | <b>Mn (%)</b> | <b>O (%)</b> | <b>C (%)</b> |
|---------------|---------------|--------------|--------------|
| 14,8          | 27,1          | 54,6         | 3,5          |

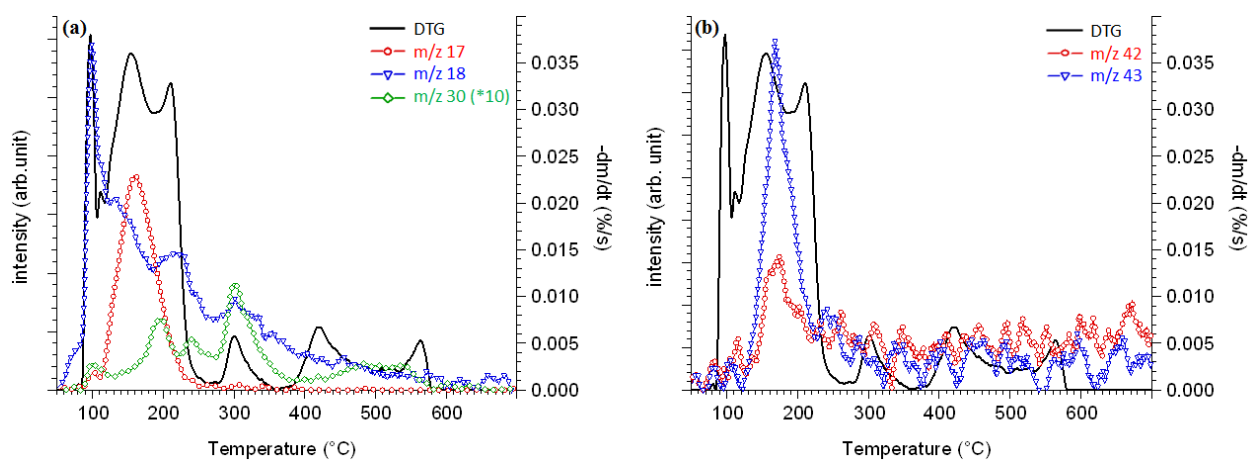

**ESI Figure S33.** TG/MS ion intensity curves of oxidation ((a) H<sub>2</sub>O,  $m/z=18$  and NO,  $m/z=30$ ) and ligand decomposition products ((a) NH<sub>3</sub>,  $m/z=17$ ; (b) HNCO/NCO  $m/z=43/42$ ) formed during the thermal decomposition of compound **1** in Ar atmosphere.

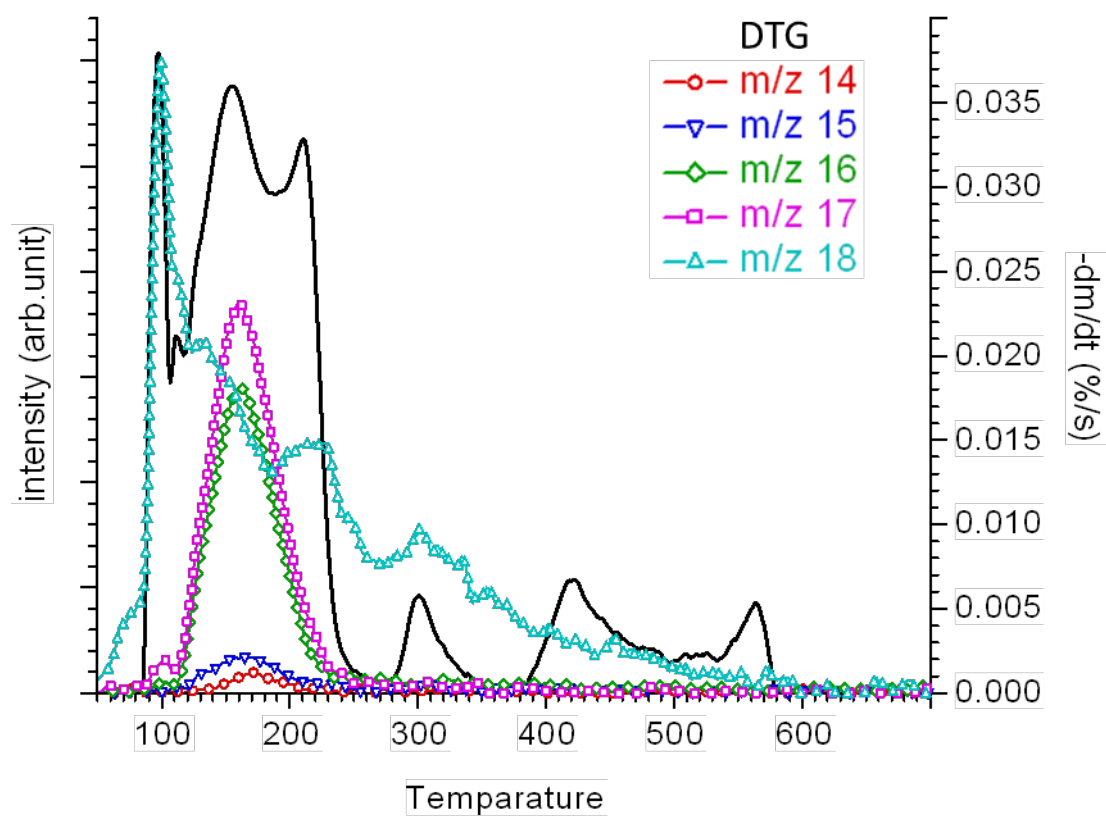

**ESI Figure S34.** The TG-MS ion curves showing  $m/z = 14, 16, 17, 18$ .



**ESI Table S20.** *Catalytic effect of the thermal decomposition products of compound 1 in CO<sub>2</sub> hydrogenation.*

| Sample ID | Heat treatment condition | $T_{\text{transf}}$ (K) | Max. Conversion (%) | CO (%) | CH <sub>4</sub> (%) | C <sub>2</sub> H <sub>6</sub> (%) | C <sub>3</sub> H <sub>8</sub> (%) |
|-----------|--------------------------|-------------------------|---------------------|--------|---------------------|-----------------------------------|-----------------------------------|
| BK2001    | 100 °C (Air)             | 373                     | 52.2                | 73.4   | 25                  | 1.6                               | ---                               |
| BK2002    | 120 °C (Air)             | 393                     | 51.8                | 67.8   | 29.8                | 2.4                               | ---                               |
| BK2003    | 180 °C (Air)             | 453                     | 50.3                | 60.6   | 34.3                | 4.2                               | 0.86                              |
| BK2004    | 350 °C (Air)             | 623                     | 57.6                | 84.8   | 12.1                | 3.1                               | ---                               |
| BK2006    | 550 °C (Air)             | 723                     | 54.6                | 92.1   | 7.9                 | ---                               | ---                               |

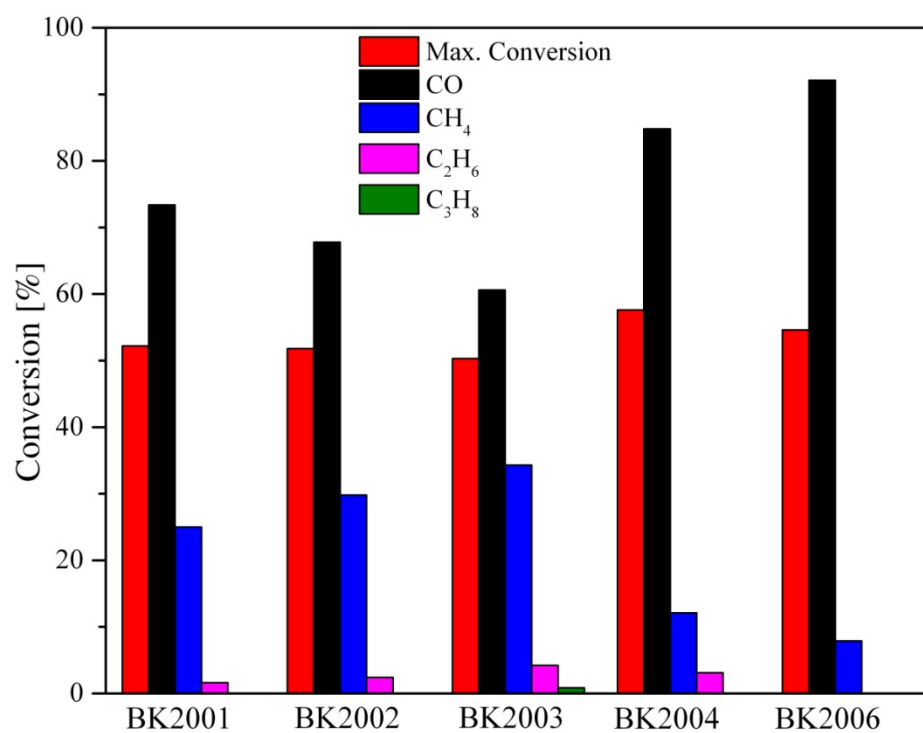

**ESI Figure S35.** Catalytic effect of the thermal decomposition products of compound **1** in CO<sub>2</sub> hydrogenation.

## Permanganate bands assignments

The symmetric stretching modes of permanganate ion in compound **1**,  $\nu_1(A \text{ or } B)$  are singlets ( $3 \times 1 A_u + 3 \times 1 B_u$ ,  $3 \times 1 A_g + 3 \times 1 B_g$ ), the antisymmetric stretching modes  $\nu_3 (2F_2)$  are triplets ( $3 \times 2 \times 3 = 18A_u$ ,  $3 \times 2 \times 3 = 18B_u$ ,  $3 \times 2 \times 3 = 18A_u$  and  $3 \times 3 \times 3 = 18B_u$  bands). The symmetric deformation modes  $\nu_2 (2E)$  are doublets ( $3 \times 2 \times 2 = 12$  IR ( $A_u, B_u$ ) and  $3 \times 2 \times 2 = 12$  Raman ( $A_g, B_g$ ) and antisymmetric deformation modes  $\nu_4 (2F_2)$  are triplets ( $3 \times 2 \times 3 = 18A_u$ ,  $3 \times 2 \times 3 = 18B_u$ ,  $3 \times 2 \times 3 = 18A_u$  and  $3 \times 3 \times 3 = 18B_u$  bands). The above-mentioned doublets and triplets originate from the splitting of the site group (the symmetry of all permanganate anions is the lowest possible, i.e.  $C_1$ ).

Among the four normal modes of a permanganate ion, the stretching modes are in the analytical IR range, whereas the two deformation modes are basically in the far-IR region. All four normal modes could easily be assigned both in the IR and Raman spectra of compound **1**. Among the two stretching modes, the  $\nu_{as}(\text{Mn-O}) (n_3)$  is of the highest intensity band in the IR at 909 and 899  $\text{cm}^{-1}$ , whereas  $\nu_s(\text{Mn-O})$  is a weak intensity band at 838  $\text{cm}^{-1}$ . The  $\nu_{as}(\text{Mn-O})$  band splits into three components (913, 903, and 895  $\text{cm}^{-1}$ ) on cooling to liquid nitrogen temperature, the  $\nu_s(\text{Mn-O}) (\nu_1)$  band, however, hardly changes (839  $\text{cm}^{-1}$ ). The  $\delta_{as}$  deformation mode of permanganate ion appears as a wide band at 375  $\text{cm}^{-1}$  with a shoulder at 362  $\text{cm}^{-1}$ . The wide bands of  $\delta_{as}(\text{Mn-O})$  and the (Fe-O) at 307  $\text{cm}^{-1}$  completely overlap with the weak  $\delta_s(\text{Mn-O})$ .

In the Raman spectra of compound **1**, the  $\nu_s(\text{Mn-O})$  is the highest intensity seemingly singlet band at 840  $\text{cm}^{-1}$  (ESI Figure S12). This singlet of compound **1** in the Raman spectrum indicates that at room temperature, one could not distinguish the three crystallographically different permanganate anions (if that were possible, three singlets would appear). A doublet of low-intensity  $\nu_{as}(\text{Mn-O})$  appears at 922 and 905  $\text{cm}^{-1}$ , whereas the deformation modes appear as a doublet at 392/381  $\text{cm}^{-1}$  ( $\delta_{as}(\text{Mn-O}) (n_4)$ ), and as a wide band at 352  $\text{cm}^{-1}$  ( $\delta_s(\text{Mn-O}), n_2$ ). On cooling to 100 K, the  $\nu_{as}(\text{Mn-O})$  decomposes into four bands and 2 shoulders (917, 911, 905, 898, 893sh, and 889sh). Similarly, the  $\delta_s(\text{Mn-O})$  shows two band groups with 382sh, 380, and 378sh, or 372, 369sh), whereas  $\delta_{as}(\text{Mn-O})$  decomposed into two bands (338 and 335  $\text{cm}^{-1}$ ).

## Urea vibrational modes

Two strong groups of bands were assigned to the NH<sub>2</sub> stretching modes in the IR spectra of compound **1** recorded at 298 and 100 K (ESI Figure S11 and ESI Table S12). The band group above 3400 cm<sup>-1</sup> could tentatively be assigned to the antisymmetric, whereas the band group between 3400 and 3300 cm<sup>-1</sup> to the symmetric N-H modes. The wavenumber of N-H stretching modes in the IR spectra of compound **1** is higher than those in the IR spectra of gaseous urea. The latter phenomenon is interesting by itself and deserves more attention to be paid in the future. Due to the presence of six different crystallographic types of urea molecules (four non-equivalent equatorial and 2 non-equivalent axial ligands), some shoulders and (at 100 K), a band splitting could be observed. The three weak bands in the region of 3330 and 3230 cm<sup>-1</sup> are most probably second-order transitions of the  $\delta_s(\text{N-H})$  and the  $\nu(\text{C=O})$  modes [37]. The Raman bands of N-H stretching modes could be observed as low intensity and wide both at 298 and 123 K (ESI Figure S12).

The N-H deformation, C=O stretching, and C-N stretching modes of compound **1** are located in the 1700-1400 cm<sup>-1</sup> spectral range. The assignment of the  $\delta_{\text{as}}(\text{NH}_2)$  and  $\delta_{\text{as}}(\text{CN})$  modes in the room temperature IR spectrum are unambiguous, and these appear at 1628 and as a doublet at 1465 and 1446 cm<sup>-1</sup>, respectively. No splitting on cooling to 100 K could be observed.

The asymmetric and symmetric  $\rho(\text{NH}_2)$  bands appear at 1143 and 1036 cm<sup>-1</sup> in the room temperature IR and at 1138 or 1068 cm<sup>-1</sup> in the room temperature Raman spectra of compound **1**, respectively. The weak  $\nu(\text{CN})$  band could not be found in the spectra of compound **1**. This band appears at 936 and 1003 cm<sup>-1</sup> in the IR spectra of gaseous and solid urea. The  $\delta(\text{C=O})$  and  $\delta(\text{C-N})$  deformation and the out-of-plane modes of urea in compound **1** were also assigned and given in ESI Table S12. The presence and strength of hydrogen bonds influence the positions of the NH<sub>2</sub> rocking mode as well. The band positions shift to a lower frequency compared to the case of solid urea [37]. However, the  $\rho_{\text{as}}(\text{NH}_2)$  shifts to lower, whereas  $\rho_{\text{s}}(\text{NH}_2)$  shifts to higher wavenumbers towards the appropriate bands of gaseous urea. The NH<sub>2</sub> and C=O deformation modes shifted to a higher wavenumber compared to the gaseous urea as a consequence of hydrogen bonding.
